# Supplementary material for: Mycobacterium tuberculosis complex genetic diversity: mining the fourth international spoligotyping database (SpolDB4) for classification, population genetics and epidemiology
Source: PubMed Central journal article supplement (PMC1468417; doi:10.1186/1471-2180-6-23), 2006-03-06
Supplement: 1471-2180-6-23-S1.pdf [file 1471-2180-6-23-S1.pdf]

| Type | Spoligotype Description | Total | Geographical Distribution                                                                                                                                                                                                                                                                                                                                                                                                                                                                    | label                  |
|------|-------------------------|-------|----------------------------------------------------------------------------------------------------------------------------------------------------------------------------------------------------------------------------------------------------------------------------------------------------------------------------------------------------------------------------------------------------------------------------------------------------------------------------------------------|------------------------|
| 1    |                         | 3758  | ?(1) ARG(3) ARM(49) AUS(41) AUT(25) AZE(52) BEL(13) BGD(121) CAN(4) CHN(46) CUB(26) CZE(14) DEU(19) DNK(18) DZA(1) EST(50) FIN(4) FXX(35) GBR(10) GEO(58) GLP(1) GNB(1) GUF(6) HTI(1) IDN(147) IND(31) IRN(10) ISR(10) ITA(21) JPN(100) KAZ(38) KEN(6) KOR(1) LBY(3) LVA(76) MAR(1) MDG(20) MEX(1) MNG(10) MOZ(2) MUS(10) MWI(1) MYS(240) NLD(22) NZL(4) PAK(5) PER(4) PHL(12) POL(7) PRT(4) REU(6) RUS(426) SAU(5) SEN(8) SGP(2) SUR(1) SWE(32) THA(119) USA(1277) VNM(387) ZAF(106) ZWE(4) | BEIJING                |
| 2    |                         | 283   | ARG(36) AUT(15) BEL(5) BRA(4) CUB(21) CZE(7) DEU(2) DNK(3) DZA(2) ESP(2) FIN(6) FXX(11) GLP(12) GUF(19) HTI(37) IND(1) ITA(1) LBY(1) MEX(9) MTQ(2) NLD(3) POL(4) RUS(2) TUR(3) USA(74) ZAF(1)                                                                                                                                                                                                                                                                                                | H2                     |
| 3    |                         | 66    | ARG(2) AUT(6) BRA(2) CUB(3) FXX(3) GLP(3) HTI(1) ITA(1) MEX(9) NLD(3) POL(1) SAU(1) SUR(1) USA(29) VEN(1)                                                                                                                                                                                                                                                                                                                                                                                    | H3                     |
| 4    |                         | 118   | ARG(6) AUT(7) BEL(4) CAN(11) DEU(1) FIN(1) FXX(6) GBR(1) GLP(1) GNB(1) GUF(2) HTI(3) ITA(13) ITAS(2) KEN(1) LBY(2) MAR(1) MTQ(1) MWI(1) MYS(2) NLD(7) NOR(1) POL(1) PRT(3) RUS(2) SAU(1) SWE(2) TUR(4) USA (21) VEN(4) ZAF(5)                                                                                                                                                                                                                                                                | LAM3 and S /convergent |
| 5    |                         | 25    | GLP(1) GUF(2) HTI(7) MTQ(2) USA (13)                                                                                                                                                                                                                                                                                                                                                                                                                                                         | T1                     |
| 6    |                         | 39    | AUT(3) DNK(13) GBR(5) MYS(1) NLD(7) NZL(2) SWE(4) USA (4)                                                                                                                                                                                                                                                                                                                                                                                                                                    | EAI1_SOM               |
| 7    |                         | 32    | AUT(2) CMR(1) DEU(1) ESP(1) FXX(1) GBR(2) GLP(3) GUF(3) HTI(2) JPN(1) MEX(1) MYS(1) NLD(3) PER(1) TUR(1) USA (8)                                                                                                                                                                                                                                                                                                                                                                             | T1                     |
| 8    |                         | 63    | COM(1) DNK(16) GBR(10) IND(2) MYS(1) NLD(2) NOR(2) SWE(1) TUN(2) USA(21) ZMB(5)                                                                                                                                                                                                                                                                                                                                                                                                              | EAI5 or EAI3           |
| 9    |                         | 4     | GBR(1) NLD(2) USA (1)                                                                                                                                                                                                                                                                                                                                                                                                                                                                        | X2                     |
| 10   |                         | 61    | BEL(4) DNK(18) FXX(3) GBR(11) ITA(1) MDG(1) MWI(2) NLD(19) SWE(2)                                                                                                                                                                                                                                                                                                                                                                                                                            | EAI5 or EAI3           |
| 11   |                         | 237   | AUS(1) AUT(4) BEL(2) BGD(14) CUB(1) DEU(2) DNK(17) FXX(2) GBR(39) GLP(1) GUF(4) IDN(1) IND(34) IRN(1) MYS(17) NLD(20) NZL(6) PAK(2) SWE(1) USA(68)                                                                                                                                                                                                                                                                                                                                           | EAI3_IND               |
| 12   |                         | 3     | GLP(2) USA (1)                                                                                                                                                                                                                                                                                                                                                                                                                                                                               | X3                     |
| 13   |                         | 2     | GLP(2)                                                                                                                                                                                                                                                                                                                                                                                                                                                                                       | X3                     |
| 14   |                         | 33    | GLP(25) GUF(3) MTQ(1) USA(3) VEN(1)                                                                                                                                                                                                                                                                                                                                                                                                                                                          | X3                     |
| 15   |                         | 2     | GLP(2)                                                                                                                                                                                                                                                                                                                                                                                                                                                                                       | T1                     |
| 16   |                         | 4     | DNK(2) GBR(2)                                                                                                                                                                                                                                                                                                                                                                                                                                                                                | EAI5 or EAI3           |
| 17   |                         | 322   | ARG(3) BRA(33) CMR(2) CUB(1) CZE(3) ESP(17) FXX(1) GLP(11) GUF(7) HTI(22) MEX(3) MTQ(2) MYS(1) NAM(1) NLD(2) PHL(3) PRT(6) USA(76) VEN(128)                                                                                                                                                                                                                                                                                                                                                  | LAM2                   |
| 18   |                         | 14    | BRA(5) GBR(5) NLD(2) USA (2)                                                                                                                                                                                                                                                                                                                                                                                                                                                                 | X2                     |
| 19   |                         | 430   | AUS(11) AUT(13) BEL(1) FIN(1) FXX(2) GBR(1) GLP(2) IDN(1) ITA(20) JPN(1) MYS(43) NLD(3) PHL(132) SUR(1) SWE(4) THA(8) USA(183) VNM(3)                                                                                                                                                                                                                                                                                                                                                        | EAI2_MANILLA           |
| 20   |                         | 426   | ARG(2) AUS(2) AUT(1) BEL(8) BRA(26) CMR(7) CUB(5) DEU(10) ECU(1) ESP(7) EST(4) FIN(1) FXX(18) GBR(1) GEO(1) GLP(3) GNB(3) GUF(10) HTI(26) IDN(1) LBY(1) MEX(7) MOZ(1) MWI(11) NAM(62) NLD(11) PER(1) PHL(2) PRT(49) RUS(3) SWE(3) USA(108) VEN(26) VNM(1) ZAF(1) ZWE(2)                                                                                                                                                                                                                      | LAM1                   |
| 21   |                         | 145   | AUT(1) BEL(1) COM(3) DNK(2) FIN(2) FXX(6) GBR(9) ITA(1) KEN(17) MDG(37) MOZ(1) MUS(1) MWI(3) NLD(12) SDN(1) SWE(3) TZA(1) USA(18)n ZAF(1) ZMB(22) ZWE(3)                                                                                                                                                                                                                                                                                                                                     | CAS1_KILI              |
| 22   |                         | 24    | BGD(2) EGY(1) FIN(2) FXX(1) GBR(1) IRN(5) NLD(2) SAU(7) ZMB(3)                                                                                                                                                                                                                                                                                                                                                                                                                               | CAS                    |
| 23   |                         | 3     | GBR(3)                                                                                                                                                                                                                                                                                                                                                                                                                                                                                       | CAS                    |
| 24   |                         | 6     | GBR(1) NLD(2) SDN(2) SWE(1)                                                                                                                                                                                                                                                                                                                                                                                                                                                                  | CAS1_DELHI             |
| 25   |                         | 128   | AUS(2) AUT(1) BEL(1) BGD(4) CAF(1) CZE(2) EGY(2) EST(1) ETH(1) FXX(5) GBR(10) GEO(1) IDN(2) IND(1) IRN(5) ITA(3) LBY(9) MUS(1) NLD(13) PAK(2) SAU(4) SDN(14) SEN(1) SWE(5) USA(35) ZAF(1) ZWE(1)                                                                                                                                                                                                                                                                                             | CAS1_DELHI             |
| 26   |                         | 404   | AUS(9) AUT(9) BEL(4) BGD(54) COM(1) DEU(6) DNK(1) FIN(1) FXX(7) GBR(15) GEO(1) GLP(1) IND(48) IRN(7) ITA(7) KEN(9) MUS(2) MYS(4) NLD(37) NZL(2)                                                                                                                                                                                                                                                                                                                                              | CAS1_DELHI             |

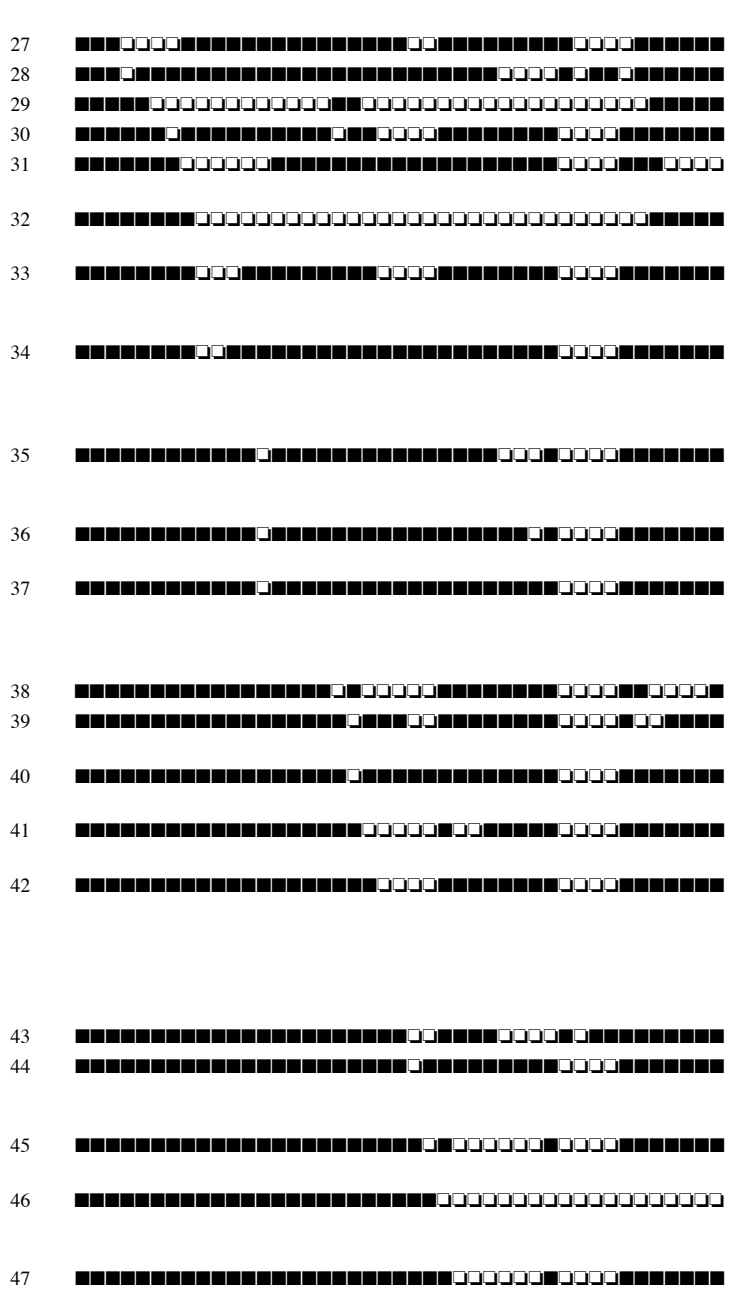

PAK(26) PRT(2) SAU(2) SDN(3) SWE(10) USA(135) ZAF(1)  
 11 AUS(1) DEU(2) GBR(3) KEN(1) PAK(1) SAU(1) USA(2)  
 5 MYS(1) NLD(4)  
 29 ESP(1) FXX(6) GLP(5) PRT(1) USA (16)  
 3 GLP(2) USA(1)  
 40 AUS(1) AUT(1) CUB(1) CZE(13) FIN(1) FXX(6) GLP(2) GUF(3) ITA(4) MDG(3) MTQ(1) NLD(1) USA (3)  
 65 BEL(31) BRA(1) DEU(1) FXX(1) GUF(2) IDN(10) ITA(3) MYS(2) NLD(7) NZL(2) SWE(1) USA (2) ZMB(2)  
 342 ARG(60) AUT(5) BEL(6) BRA(17) CHL(1) CUB(15) ESP(18) FIN(1) FXX(27) GBR(3) GUF(3) HND(1) HTI(1) ITA(13) ITAS(5) LBY(2) MDG(3) MEX(1) MOZ(2) NLD(5) PER(2) PRT(7) SWE(1) USA(89) VEN(4) ZAF(50)  
 362 ARG(6) AUS(2) AUT(16) BEL(1) BRA(7) CAN(75) CUB(1) DEU(3) DZA(6) EGY(5) FIN(2) FXX(13) GBR(2) GEO(3) GLP(2) GUF(5) HTI(7) IDN(3) IND(1) ITA(37) ITAS(10) KEN(3) LBY(2) MAR(1) MDG(3) MEX(1) MOZ(2) MWI(1) NLD(3) NZL(2) PRT(8) REU(1) SAU(3) SWE(3) THA(1) USA(92) VEN(8) VNM(2) ZAF(19)  
 74 ARG(1) ARM(3) AUT(13) AZE(3) BEL(1) CHN(1) CZE(3) DEU(2) ESP(1) EST(2) FIN(4) GBR(2) GLP(1) IRN(2) JPN(2) KAZ(3) LVA(1) MEX(1) NLD(1) POL(2) RUS(18) USA (6) ZAF(1)  
 43 ARG(1) AUS(3) AUT(4) BRA(1) CZE(2) DEU(5) FIN(2) FXX(3) GUF(1) ITA(2) LBY(4) MTQ(1) NLD(4) POL(1) SAU(1) TUN(1) USA (5) VEN(1) VNM(1)  
 155 AUS(2) AUT(12) BEL(3) BRA(3) CAN(5) CHN(2) CIV(1) CUB(5) CZE(8) DEU(4) DNK(17) DZA(1) EST(1) ETH(1) FIN(5) FXX(8) GBR(1) GEO(1) GLP(1) GUF(1) HTI(1) IDN(1) IRN(4) ITA(2) ITAS(1) LBY(1) LVA(1) MDG(3) NLD(11) NZL(2) PAK(1) POL(4) SAU(2) SWE(6) THA(1) TUR(1) USA(26) VEN(1) ZWE(4)  
 125 GBR(3) IND(3) USA (119)  
 67 ARM(2) AUT(21) BEL(1) CZE(1) DEU(6) FXX(1) GBR(1) ITA(1) NLD(2) POL(5) USA (7) VNM(1) ZAF(18)  
 87 AUT(14) BEL(1) CZE(7) DEU(5) DNK(4) ESP(1) ETH(2) FIN(4) FXX(10) GBR(2) GEO(1) GLP(4) IRN(1) ITA(1) ITAS(1) LBY(1) MDG(1) NLD(2) POL(1) RUS(4) USA(20)  
 127 AUT(5) BEL(1) CZE(2) DEU(6) DNK(7) EGY(2) ETH(7) FIN(2) FXX(11) GBR(6) GUF(1) ITA(1) NLD(28) NOR(4) NZL(2) POL(1) ROM(1) SAU(1) SWE(2) TUR(33) USA(4)  
 1227 ARG(69) ARM(4) AUS(3) AUT(25) AZE(4) BEL(25) BGD(28) BRA(54) CAF(3) CMR(1) CUB(19) CZE(4) DEU(6) DZA(11) EGY(1) ESP(14) EST(5) ETH(3) FIN(25) FXX(45) GBR(5) GEO(7) GLP(11) GNB(22) GUF(15) HTI(27) IDN(1) IND(3) IRN(2) ITA(77) ITAS(17) KAZ(4) KEN(8) LBY(2) LVA(19) MAR(27) MDG(4) MEX(25) MOZ(2) MTQ(3) MWI(5) MYS(1) NLD(32) NZL(26) PER(7) PHL(5) POL(6) PRT(44) PYF(1) RUS(68) SAU(2) SEN(2) SWE(12) THA(1) TUN(1) TUR(1) USA (259) VEN(90) VNM(1) ZAF(7) ZWE(26)  
 17 DEU(3) GBR(3) ITA(1) MYS(1) NLD(3) SWE(2) USA(3) VNM(1)  
 112 ARG(3) AUS(1) AUT(28) BEL(1) CMR(1) CZE(8) DEU(2) DNK(1) EGY(1) ESP(1) EST(1) FIN(2) FXX(3) GBR(2) GLP(3) GUF(3) IDN(1) IND(1) ITA(14) ITAS(2) NLD(3) POL(3) PRT(4) USA (15) VEN(4) ZAF(3) ZWE(1)  
 63 AUT(18) BRA(6) CZE(1) DEU(4) DNK(2) ESP(1) GBR(1) GLP(5) HTI(1) ITA(3) MDG(1) MNG(1) MTQ(7) MYS(1) NLD(2) PRT(1) RUS(2) USA (6)  
 95 ARG(5) AUS(1) AUT(6) CMR(1) CZE(13) DEU(2) DNK(1) EGY(1) FIN(9) FXX(5) GLP(1) GUF(1) IDN(10) IND(1) ITA(1) MDG(1) MEX(3) MTQ(4) NLD(1) POL(6) SWE(1) TUR(2) USA(19)  
 721 ?(1) ARG(10) ARM(4) AUS(3) AUT(126) AZE(1) BEL(12) BGD(1) BRA(23) CAF(37) CAN(5) CMR(3) CUB(12) CZE(38) DEU(24) DNK(1) ESP(11) EST(4) FIN(29) FXX(33) GBR(5) GLP(3) GNB(8) GUF(3) HTI(4) HUN(1) IND(1) ITA(51) ITAS(7) MAR(3) MDG(9) MEX(10) NLD(36) POL(16) PRT(19) ROM(1) RUS(6) SAU(1) SEN(6) SWE(9)

- U(CAS\_ANCESTOR?)
- EAI5
- U (likely LAM)
- LAM9
- T1
- U (likely S)
- LAM3
- S
- H4
- H3-T3
- T3
- X2
- T4-CEU1
- T4
- LAM7\_TUR
- LAM9
- EAI6\_BGD1
- T5
- H1
- U (likely H)
- H1



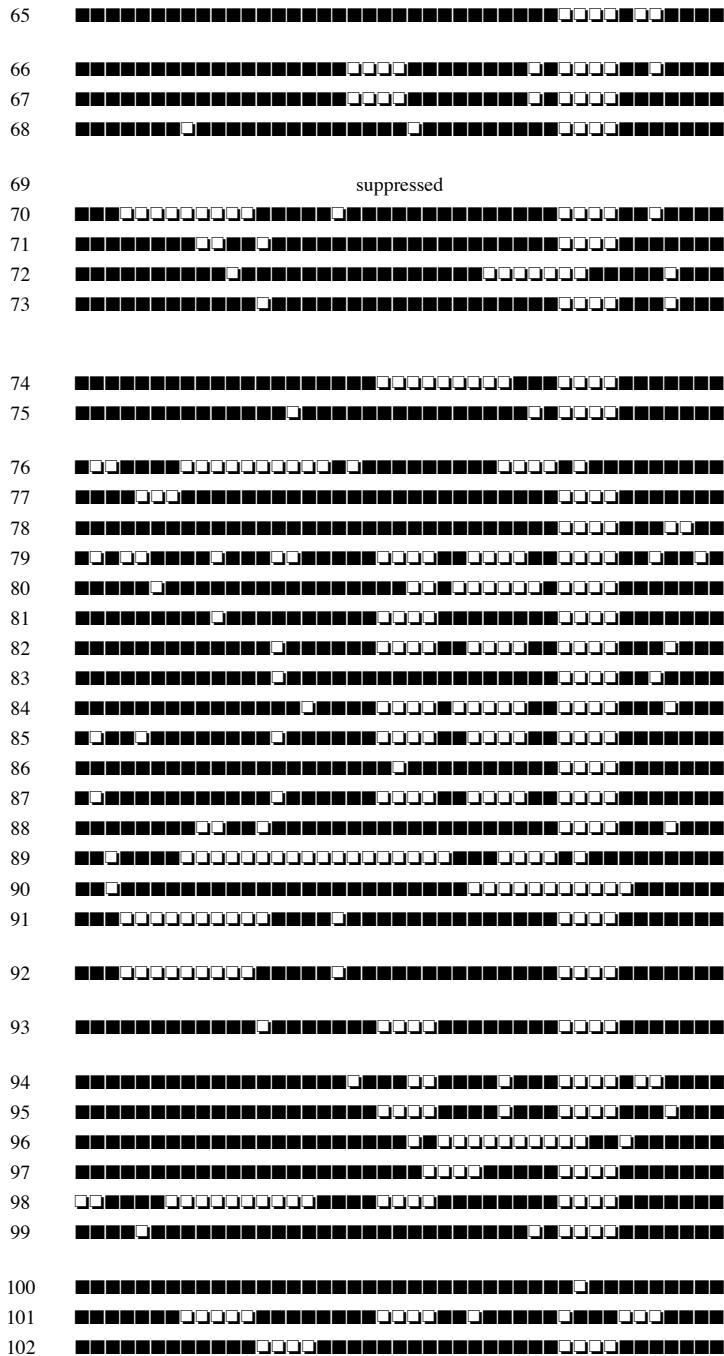

65 AUT(4) BRA(23) CMR(3) CZE(1) DEU(2) DZA(1) ESP(2) FXX(5) GLP(1) GUF(1)  
HTI(12) ITA(1) KAZ(1) MTQ(1) SWE(1) USA (6)

2 GUF(2)

25 GLP(2) GUF(4) HTI(1) MEX(1) USA (17)

50 ARG(26) AUT(4) BRB(1) CZE(5) DEU(3) FXX(1) GBR(1) IND(1) ITA(2) MTQ(1)  
NLD(2) SWE(2) USA (1)

2 SUPPRESSED SHARED-TYPE

72 GBR(2) GLP(2) GUF(6) HTI(8) MEX(3) PHL(2) USA(49)

33 ARG(1) CAN(2) CUB(5) FXX(4) IND(1) ITA(9) ITAS(3) NLD(1) USA(2) VEN(2) ZAF(3)

16 GLP(1) GUF(7) USA (8)

114 AUS(1) AUT(5) BEL(3) BRA(4) EGY(7) FIN(1) FXX(9) GEO(3) GLP(1) GNB(1)  
GUF(6) HTI(1) IDN(4) ITA(22) MDG(3) MEX(1) MOZ(2) MTQ(1) NLD(2) PRT(3)  
SWE(1) USA(27) VEN(1) VNM(4) ZWE(1)

6 CUB(3) MDG(3)

29 ARG(3) BRA(1) CMR(5) DEU(1) FXX(7) GLP(2) HTI(1) HUN(1) MDG(1) MEX(1)  
PRT(1) ROM(2) USA (3)

2 GUF(2)

11 GLP(1) GUF(4) HTI(4) USA (2)

32 AUT(2) CZE(1) ESP(1) FIN(1) GBR(3) GUF(2) IND(3) ITA(1) MDG(13) NLD(1) SAU(2) USA (2)

2 ZWE(2)

8 CUB(8)

20 ARG(1) BRA(1) CUB(16) ITA(1) ZWE(1)

4 ZWE(4)

2 ZWE(2)

2 ZWE(2)

2 ZWE(2)

46 AUT(2) ESP(2) FXX(4) GUF(1) ITA(1) ITAS(1) MDG(27) NLD(1) TUR(2) USA(4) VEN(1)

2 ZWE(2)

3 CUB(1) DZA(1) GUF(1)

67 AUS(1) FXX(1) GLP(1) GUF(1) IDN(2) MYS(4) NLD(5) SWE(3) THA(36) USA(11) VNM(2)

6 AUT(2) ITA(1) NLD(1) POL(2)

143 ARG(3) BRA(1) CAN(8) DNK(5) ESP(2) GBR(6) GLP(1) GUF(5) HTI(29) NLD(2)  
PER(1) USA (79) VEN(1)

123 ARG(1) AUS(2) AUT(1) BRA(3) CUB(2) DNK(4) GBR(14) GNB(1) GUF(6) MEX(2)  
MWI(1) NLD(8) NOR(1) NZL(2) USA(60) ZAF(14) ZWE(1)

188 ARG(2) AUS(1) BRA(13) DEU(3) ESP(2) FXX(1) GLP(7) GUF(2) HTI(15) ITA(14)  
ITAS(1) NLD(1) USA(44) VEN(82)

5 GUF(5)

11 BRA(2) GBR(1) GUF(2) USA(6)

42 BGD(36) GUF(4) USA (2)

3 MNG(2) SWE(1)

4 DEU(1) MNG(3)

31 ARG(1) AUT(3) BRA(1) CZE(2) DEU(1) DZA(1) FIN(1) IND(1) ITA(2) JPN(1)  
MDG(6) NLD(3) ROM(1) USA (7)

39 FXX(1) GBR(6) IND(23) MYS(1) THA(1) USA(6) VNM(1)

16 CMR(8) FXX(4) GLP(2) USA (2)

46 ARG(3) AUS(3) BRA(5) DEU(2) FXX(3) GLP(2) GUF(1) IDN(5) ITA(1) MAR(1)

T1 (T4-CE1 ancestor?)

H3-LAM

H3-LAM

T5

X3

S

EAI undefined

T2-T3

T1

H3

EAI5 or EAI3

T1

T1-T2

LAM11\_ZWE

H1

LAM9

LAM11\_ZWE

T1

LAM11\_ZWE

LAM11\_ZWE

T1

LAM11\_ZWE

S

EAI2\_NTB

U

X3

X3

LAM5

T4-CEU1

LAM6

EAI7\_BGD2

T1

LAM9?

H3

MANU1

AFRI\_2

T1



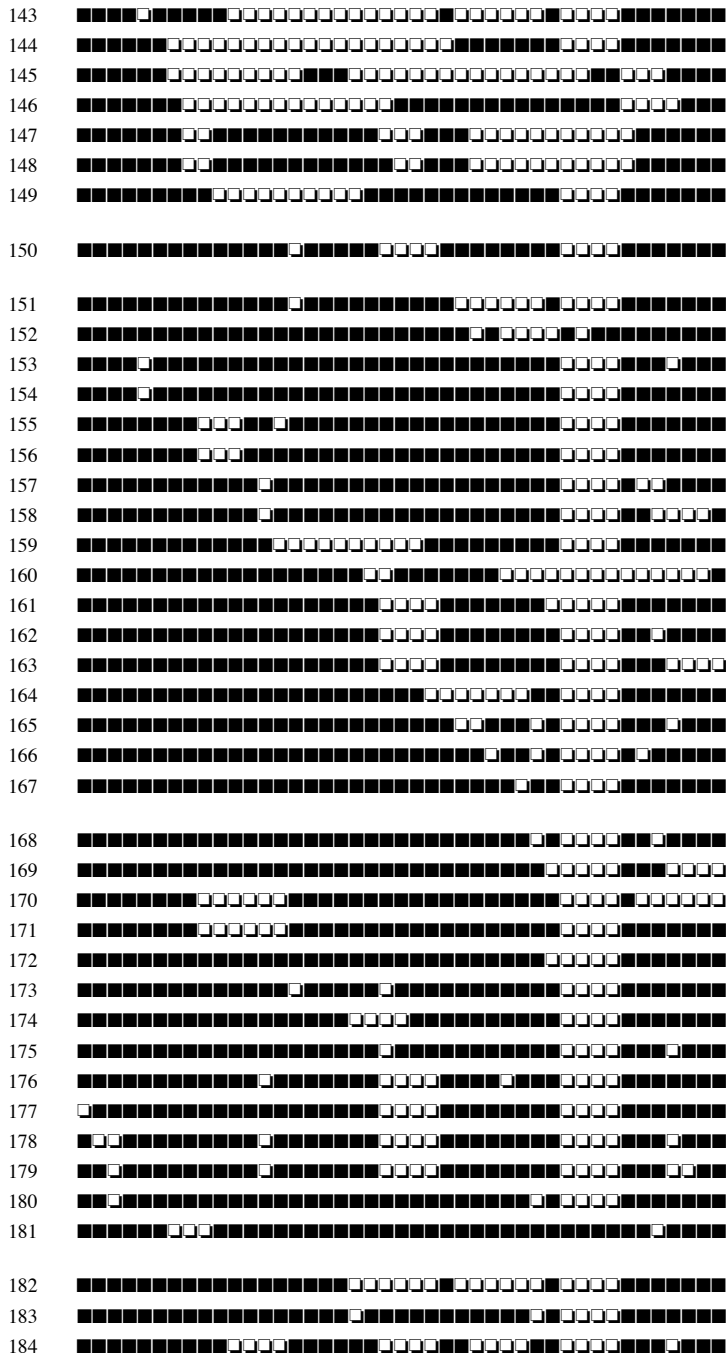

- 5 DZA(1) FXX(2) NLD(2)
- 10 DEU(1) FXX(4) GBR(1) NLD(1) PRT(1) USA (2)
- 3 FXX(3)
- 2 FXX(2)
- 3 FXX(3)
- 2 FXX(2)
- 208 AUT(1) BEL(1) DEU(1) DNK(57) ETH(79) FIN(1) FXX(9) GBR(13) ITA(2) LBY(1) NLD(16) NOR(2) SWE(6) USA(19)
- 65 ARG(6) BEL(22) BRA(3) DZA(1) EGY(1) FIN(1) FXX(8) GUF(2) ITA(3) ITAS(1) MAR(1) MEX(1) PRT(9) RUS(1) USA (1) VEN(4)
- 15 ARG(1) AUT(1) CAF(2) CUB(2) EGY(1) FXX(3) HTI(1) ITA(1) POL(1) PRT(1) SWE(1)
- 26 FXX(1) GUF(1) ITA(1) NLD(2) SWE(1) USA(12) VNM(8)
- 44 AUT(1) BRA(4) CUB(5) ETH(1) FIN(4) ITA(20) NLD(1) SWE(2) USA (6)
- 41 ARG(3) AUS(1) AUT(12) DEU(3) ESP(1) FIN(1) FXX(2) HUN(1) ITA(9) NLD(1) RUS(1) USA (6)
- 2 ITA(2)
- 33 AUT(1) BRA(2) ESP(1) ITA(4) MDG(22) USA(3)
- 7 DEU(1) ITA(2) PRT(4)
- 3 ITA(2) ZAF(1)
- 54 ARG(10) AUS(1) AUT(8) DEU(1) EST(2) FXX(1) ITA(23) ITAS(3) LVA(1) MEX(1) USA (3)
- 13 ARG(1) BEL(2) CUB(1) ESP(2) ITA(2) ITAS(1) USA (4)
- 4 ITA(1) NLD(1) RUS(1) USA(1)
- 13 ARG(1) FIN(1) FXX(2) ITA(1) ITAS(2) USA(1) VEN(5)
- 21 HTI(3) ITA(4) MEX(2) USA (12)
- 24 AUT(2) FXX(1) HUN(1) ITA(14) ITAS(1) MDG(1) NLD(1) USA(3)
- 3 ITA(3)
- 6 ITA(5) USA (1)
- 30 AUT(4) BEL(1) BRA(1) CUB(1) ESP(4) FIN(2) FXX(1) GBR(1) IDN(1) ITA(1) MNG(1) NLD(3) SDN(1) TUR(1) USA (5) VEN(2)
- 16 AUT(1) GEO(1) GLP(1) HTI(4) ITA(1) MYS(1) NLD(4) USA(3)
- 6 ITA(5) ITAS(1)
- 2 FXX(2)
- 2 FXX(2)
- 32 AUT(7) BEL(1) DEU(2) FIN(1) FXX(4) HTI(2) ITA(5) MYS(1) NLD(1) PAK(1) RUS(1) USA (6)
- 6 FXX(4) TUR(1) USA (1)
- 11 FXX(5) HTI(1) RUS(1) USA (3) VNM(1)
- 18 ARG(8) FXX(1) HTI(2) ITA(4) PER(1) SUR(1) USA (1)
- 16 BRA(1) CAF(1) GUF(2) USA (12)
- 21 ARG(1) BRA(8) EGY(2) ESP(1) FXX(2) GUF(1) ITA(3) MYS(1) USA(2)
- 4 CUB(1) SEN(1) VEN(2)
- 8 BRA(6) GUF(1) PRT(1)
- 23 AUT(3) CAF(6) CIV(1) CZE(2) ESP(4) MYS(1) NLD(1) POL(1) RUS(1) SWE(1) USA (1) VNM(1)
- 126 ?(1) BEL(1) DEU(3) DNK(1) FXX(6) GBR(3) GNB(72) GUF(1) ITA(7) NLD(9) SEN(7) SWE(1) USA (14)
- 2 NLD(1) SEN(1)
- 19 CZE(2) DEU(1) ESP(4) FXX(1) HUN(1) ITA(4) SEN(2) USA (4)
- 11 FXX(2) ZWE(9)

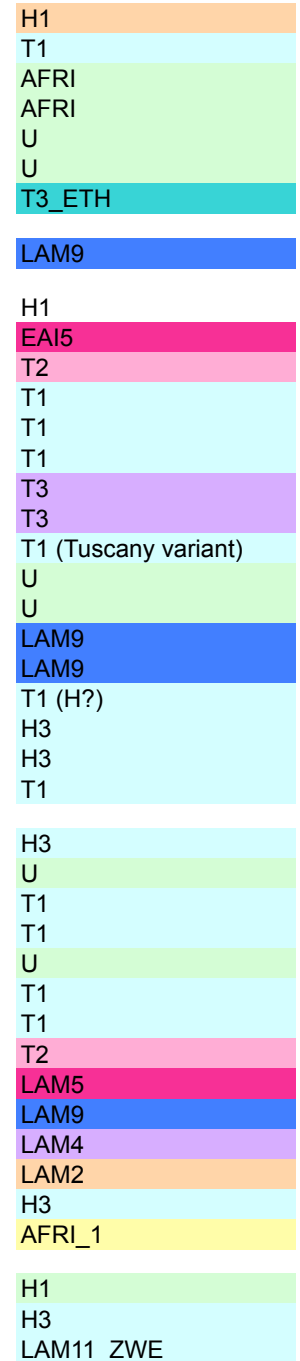

185  
186  
187  
188  
189  
190  
191  
192  
193  
194  
195  
196  
  
197  
198  
199  
200  
201  
202  
203  
204  
205  
206  
207  
208  
209  
210  
211  
212  
213  
214  
215  
216  
217  
218  
219  
220  
221  
222  
223  
224  
225  
226  
227  
228

11 BRA(1) DNK(3) FXX(2) GLP(1) USA (4)  
3 EGY(1) FXX(2)  
39 FXX(1) GBR(1) GIN(1) GNB(27) ITA(1) MDG(1) SEN(1) USA (6)  
3 GBR(1) GNB(2)  
8 CUB(2) FIN(1) PER(1) SWE(1) USA (3)  
48 CUB(1) GEO(2) IDN(1) LVA(1) MYS(2) NLD(1) RUS(3) THA(5) USA (30) VNM(2)  
10 ARG(1) AUT(1) GEO(1) GLP(1) NLD(1) RUS(2) USA (3)  
2 USA (2)  
17 GUF(1) HTI(8) USA (8)  
12 BRA(1) MEX(2) USA (4) VEN(5)  
4 BRA(2) GLP(1) USA (1)  
35 AUT(4) BRA(3) DZA(3) FXX(1) GEO(1) HTI(1) ITA(3) MDG(4) NLD(3) RUS(1)  
SWE(2) TUR(3) USA(3) VEN(2) ZAF(1)  
244 GBR(1) IND(3) USA(7) USA (229) USA (4)  
28 USA (28)  
15 MEX(2) USA(13)  
27 AUS(1) CIV(1) GBR(5) IND(1) MEX(1) MWI(2) NOR(1) USA(15)  
2 USA (2)  
3 USA (3)  
8 FXX(1) SAU(1) USA (6)  
10 FXX(1) THA(1) USA (7) VNM(1)  
15 AUS(1) BRA(2) DEU(1) FXX(1) GBR(1) HTI(1) KEN(1) MYS(1) USA (4) VEN(1) VNM(1)  
7 BEL(1) USA(6)  
12 AUT(2) MTQ(1) USA(9)  
2 USA (2)  
23 BEL(2) CUB(3) ESP(10) FXX(5) ITA(1) USA(2)  
104 USA(104)  
50 ARG(1) AUS(1) ESP(1) FXX(2) MDG(1) MEX(12) PRT(3) USA(28) ZAF(1)  
11 AUT(1) CAN(7) USA(3)  
9 ITAS(2) MYS(1) USA(6)  
45 USA(45)  
5 ESP(3) USA (2)  
9 ARG(1) ITA(2) USA (5) VEN(1)  
15 AUS(1) GBR(1) MEX(2) USA(11)  
14 AUT(3) BEL(1) ESP(1) IDN(1) NLD(1) RUS(1) USA (5) ZWE(1)  
30 PER(2) USA(28)  
7 USA (7)  
7 LBY(1) USA(6)  
11 ESP(3) MEX(1) PER(1) USA (6)  
5 USA(5)  
8 USA(8)  
4 FXX(1) USA (3)  
3 BEL(1) USA (2)  
5 USA (5)  
5 USA (5)

X2  
LAM7\_TUR  
AFRI\_1  
AFRI  
T1  
BEIJING  
T1  
EAI5  
LAM2  
LAM2-LAM4  
LAM1  
T1  
  
X3  
T1  
U  
X3  
CAS  
X2  
CAS  
EAI5  
T1  
LAM9  
H3  
EAI4\_VNM  
LAM12\_MAD1  
T1  
LAM3  
S  
LAM4  
T5  
T1  
LAM9  
X1  
H1  
T1  
X2  
X1  
T1  
T1  
X1  
X1  
MANU2  
H3  
T1

229 ██████████  
 230 ██████████  
 231 ██████████  
 232 ██████████  
 233 ██████████  
 234 ██████████  
 235 ██████████  
 236 ██████████  
 237 ██████████  
 238 ██████████  
 239 ██████████  
 240 ██████████  
 241 ██████████  
 242 ██████████  
 243 ██████████  
 244 ██████████  
 245 ██████████  
 246 ██████████  
 247 ██████████  
 248 ██████████  
 249 ██████████  
 250 ██████████  
 251 ██████████  
 252 ██████████  
 253 ██████████  
 254 ██████████  
 255 ██████████  
 256 ██████████  
 257 ██████████  
 258 ██████████  
 259 ██████████  
 260 ██████████  
 261 ██████████  
 262 ██████████  
 263 ██████████  
 264 ██████████  
 265 ██████████  
 266 ██████████  
 267 ██████████  
 268 ██████████  
 269 ██████████  
 270 ██████████

2 USA (2)  
 15 GNB(1) HTI(1) USA (13)  
 2 USA (2)  
 6 MEX(1) NLD(1) USA (4)  
 9 USA(9)  
 17 AUS(1) BGD(3) DNK(1) NLD(1) USA (7) VNM(4)  
 2 USA (2)  
 91 AUS(5) BEL(1) BGD(6) DNK(4) FXX(1) GBR(3) GEO(2) GNB(1) IDN(1) MYS(7)  
 NLD(3) NOR(1) NZL(2) PAK(1) SEN(1) SWE(2) THA(12) USA(32)VNM(5) ZWE(1)  
 74 AUT(10) BEL(2) CMR(5) DEU(8) FIN(1) FXX(2) GBR(1) IDN(5) ITA(5) ITAS(1)  
 MDG(3) POL(6) PRT(1) RUS(7) SWE(2) USA (13) ZAF(2)  
 7 FXX(2) USA (5)  
 44 BGD(2) BRA(1) MEX(7) USA(31) VEN(3)  
 14 AUT(1) BRA(5) CUB(1) DEU(2) GUF(1) ITA(1) USA(3)  
 11 FIN(2) USA(9)  
 5 ARG(1) GUF(1) HTI(2) USA (1)  
 16 BEL(3) DNK(1) ITA(1) MYS(5) USA (6)  
 44 ARG(1) BEL(1) BGD(9) BRA(3) FXX(4) GNB(2) HTI(2) IND(1) MDG(1) NLD(1) PRT(16) USA (3)  
 11 ARG(1) AUT(1) BRA(1) ESP(1) GNB(1) GUF(1) NLD(1) USA (2) VEN(1) ZWE(1)  
 13 MYS(2) NLD(2) THA(1) USA (8)  
 4 FXX(1) SAU(1) USA (2)  
 4 USA (2) VNM(2)  
 15 AUS(1) MYS(1) NLD(1) NZL(2) USA (7) VNM(3)  
 12 AUS(1) FXX(1) IDN(2) MYS(1) USA(5) VNM(2)  
 11 FIN(1) MAR(2) NLD(1) RUS(6) USA (1)  
 39 LVA(3) RUS(32) USA (4)  
 19 ARG(5) DNK(1) FIN(1) FXX(1) IDN(4) NLD(1) POL(1) RUS(3) USA(1) VEN(1)  
 92 AUT(10) AZE(2) BEL(2) DEU(2) DNK(1) ESP(1) FIN(1) FXX(1) GEO(9) KAZ(1)  
 LVA(6) NLD(1) POL(1) RUS(50) SAU(1) USA (3)  
 19 BEL(1) FXX(1) ITA(2) MDG(1) MYS(3) REU(1) THA(3) USA(6) VNM(1)  
 54 AUS(1) DNK(1) IDN(2) IND(1) MYS(18) NLD(1) THA(10) USA(20)  
 9 DNK(9)  
 5 MEX(1) USA (4)  
 4 GLP(2) MTQ(2)  
 6 RUS(2) USA (4)  
 2 RUS(2)  
 88 ARM(2) AUT(12) AZE(1) BEL(1) CZE(1) EST(3) FIN(8) FXX(1) GEO(5) ITA(11)  
 KAZ(3) LVA(1) NLD(2) POL(3) RUS(24) SWE(1) TUR(3) USA (6)  
 5 FIN(1) RUS(4)  
 40 DEU(1) GEO(8) LVA(3) POL(6) RUS(17) USA (5)  
 26 AZE(1) ISR(5) MYS(1) NLD(2) RUS(7) THA(2) USA (7) VNM(1)  
 14 DZA(1) LVA(1) RUS(10) USA (2)  
 12 BEL(1) DEU(2) GEO(4) LBY(2) RUS(2) USA (1)  
 5 ESP(1) MTQ(1) PER(2) RUS(1)  
 38 DEU(2) FXX(1) GEO(1) HTI(2) IDN(1) JPN(1) MEX(1) RUS(8) SAU(1) USA(19) VNM(1)  
 3 MYS(1) NLD(2)

U  
 T1  
 T5  
 U  
 T2  
 EAI5  
 EAI1\_SOM  
 EAI5  
 U (likely H3)  
 U  
 U  
 U  
 T1  
 T1  
 T1  
 T1  
 T1  
 U  
 CAS1\_DELHI  
 EAI4\_VNM  
 T1  
 BEIJING-LIKE  
 T1  
 LAM9  
 T1  
 T5\_RUS1  
 BEIJING  
 EAI5  
 EAI5  
 T1  
 T1  
 BEIJING  
 T1  
 H4  
 T1  
 T1  
 BEIJING  
 T1  
 T1  
 H3  
 BEIJING-LIKE  
 EAI1\_SOM



271 ██████████  
 272 □□□█████████  
 273 ██████████  
 274 ██████████  
 275 ██████████  
 276 ██████████  
 277 ██████████  
 278 ██████████  
 279 ██████████  
 280 ██████████  
 281 ██████████  
 282 ██████████  
 283 ██████████  
 284 □□□█████████  
 285 ██████████  
 286 ██████████  
 287 ██████████  
 288 ██████████  
 289 ██████████  
 290 ██████████  
 291 ██████████

292 ██████████  
 293 ██████████  
 294 ██████████  
 295 ██████████  
 296 ██████████  
 297 ██████████  
 298 ██████████  
 299 ██████████  
 300 ██████████  
 301 ██████████  
 302 ██████████  
 303 ██████████  
 304 ██████████  
 305 ██████████  
 306 ██████████  
 307 ██████████  
 308 ██████████  
 309 ██████████  
 310 ██████████  
 311 ██████████  
 312 ██████████  
 313 ██████████

2 NLD(2)  
 6 BEL(1) ITAS(2) USA (3)  
 4 ITA(1) ITAS(2) VEN(1)  
 7 AUT(2) GUF(1) ITAS(1) RUS(1) SAU(1) USA (1)  
 6 BEL(1) BRA(1) CUB(1) ITAS(2) USA (1)  
 29 AUT(5) CZE(1) FXX(1) IND(2) ITAS(1) NLD(1) POL(1) SWE(1) USA(16)  
 4 ITA(2) ITAS(2)  
 5 FIN(1) ITAS(2) SEN(1) USA (1)  
 5 AUS(2) MYS(3)  
 46 AUS(4) AUT(3) DEU(3) EST(1) FIN(7) GEO(1) LVA(1) POL(4) RUS(5) SWE(1) TUR(2) USA (14)  
 13 AUS(4) BEL(1) ESP(2) FXX(1) IND(2) NLD(1) PAK(1) SAU(1)  
 2 AUS(2)  
 30 ARG(3) AUS(3) AUT(7) CZE(2) FXX(1) LVA(6) NLD(2) SWE(2) USA(4)  
 35 AUS(1) AUT(10) DEU(4) DNK(1) FIN(1) IRN(1) MEX(1) NLD(2) RUS(1) SAU(4) TUR(8) USA (1)  
 3 AUS(1) FXX(1) THA(1)  
 8 AUS(1) GLP(1) IDN(1) ITA(1) PHL(2) USA(2)  
 10 AUS(1) FXX(1) IDN(1) MYS(3) PHL(2) USA (2)  
 40 AUS(1) BGD(2) DEU(2) GBR(1) IND(8) IRN(1) NLD(5) USA(20)  
 5 AUS(1) IND(1) NLD(2) USA (1)  
 17 AUS(1) FXX(1) GLP(1) IDN(9) MYS(1) USA (4)  
 47 ARG(3) AUS(1) BEL(1) BGD(3) BRA(4) CZE(2) EGY(1) ESP(1) GEO(6) HTI(1)  
 IDN(1) IND(1) ITA(5) MDG(1) NAM(1) NLD(1) PER(1) POL(2) RUS(1) TUR(1)  
 USA (1) VEN(1) VNM(1) ZWE(6)  
 73 AUS(1) BGD(62) FIN(1) GEO(1) ITAS(1) MYS(3) USA (4)  
 6 AUS(1) FXX(1) PRT(1) USA (3)  
 11 AUT(1) DEU(3) GBR(1) HTI(1) IDN(1) MYS(1) NLD(1) USA(2)  
 12 GLP(1) HTI(5) USA (6)  
 2 DNK(2)  
 2 DNK(2)  
 26 DNK(23) IND(2) USA(1)  
 22 DNK(12) MYS(1) NLD(7) NZL(2)  
 2 DNK(2)  
 3 DNK(3)  
 28 DNK(18) GBR(1) ITA(2) KEN(4) MDG(1) NLD(1) NOR(1)  
 2 DNK(2)  
 3 USA (3)  
 2 USA (2)  
 16 BEL(3) CAF(2) FXX(2) GBR(2) GUF(1) USA (6)  
 4 CAF(4)  
 2 CAF(2)  
 2 CAF(2)  
 3 CAF(3)  
 2 CAF(2)  
 9 CAF(6) CMR(2) FXX(1)  
 2 CAF(2)

U  
 T1  
 LAM9  
 U  
 H3  
 T1  
 T1  
 T1  
 EAI2\_MANILLA  
 T1\_RUS2  
 T1  
 X2  
 H1  
 T1  
 T1  
 U  
 EAI2\_MANILLA  
 CAS2  
 CAS1\_DELHI  
 LAM8  
 T1

EAI6\_BGD1  
 H3  
 H3  
 S  
 EAI3\_IND  
 EAI5  
 EAI3\_IND  
 U  
 EAI4\_VNM  
 EAI5  
 X1  
 EAI1\_SOM  
 T5  
 H37Rv?  
 T1  
 H3  
 BOV  
 CAS1\_DELHI  
 H3  
 H3  
 H3  
 T2

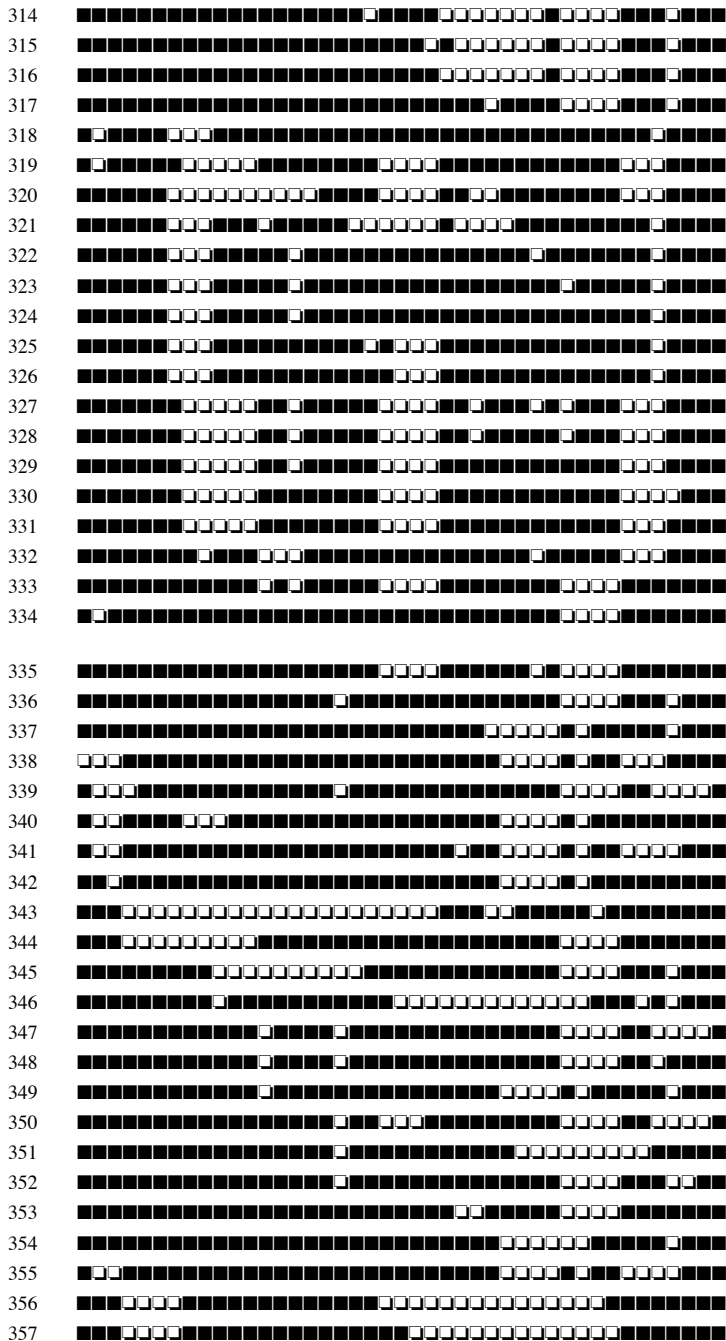

4 CAF(4)  
 10 CAF(6) ESP(1) MDG(1) USA(2)  
 26 CAF(13) CIV(1) CMR(5) FXX(2) LBY(1) MDG(1) SDN(1) THA(1) USA (1)  
 15 BEL(2) CAF(2) CMR(10) FXX(1)  
 3 CIV(1) GNB(2)  
 9 CIV(1) CMR(3) POL(1) USA(4)  
 4 CMR(2) USA(2)  
 2 CIV(2)  
 3 MRT(2) SEN(1)  
 3 FXX(1) SEN(2)  
 5 FXX(3) SEN(2)  
 6 FXX(2) ITA(1) USA(3)  
 26 BEL(2) DEU(2) FXX(4) GIN(1) GLP(1) GNB(2) ITA(2) MTQ(1) NLD(6) USA (5)  
 3 CMR(3)  
 9 CMR(8) SEN(1)  
 5 BEL(1) CIV(1) CMR(3)  
 3 BEL(1) CAF(1) CMR(1)  
 18 BFA(1) CIV(3) CMR(3) NGA(1) NLD(1) USA (9)  
 5 CMR(5)  
 10 GLP(1) GUF(1) VEN(8)  
 39 BEL(2) ESP(2) FIN(2) FXX(2) GBR(2) GEO(3) GLP(1) GNB(3) GUF(3) HTI(1)  
 IND(1) ITA(5) JPN(1) MTQ(1) NLD(1) SEN(1) SWE(1) USA (5) VNM(2)  
 27 AUT(3) CZE(5) ESP(1) FXX(4) ITA(4) MTQ(2) ROM(1) RUS(3) SWE(1) USA (2) VNM(2)  
 37 DNK(1) GBR(5) ITA(2) MDG(1) MEX(2) RUS(2) SWE(5) USA(12) ZAF(7)  
 3 FXX(1) KEN(2)  
 7 BGD(1) GBR(5) MYS(1)  
 16 GBR(16)  
 21 AUS(1) DNK(2) FXX(1) GBR(2) IND(6) MYS(1) NLD(1) USA (7)  
 2 GBR(2)  
 8 BEL(1) DEU(1) DNK(1) GBR(2) NLD(1) USA(2)  
 5 ETH(2) GBR(2) (1) USA  
 7 GBR(2) GUF(1) PRT(4)  
 10 FIN(1) GBR(4) KEN(2) NOR(1) USA (2)  
 2 GBR(2)  
 16 GBR(2) GUF(1) ITAS(1) NZL(2) USA(8) ZAF(2)  
 7 GBR(2) USA(1) ZAF(4)  
 11 BGD(1) GBR(2) USA (8)  
 5 AUT(1) GBR(4)  
 19 GBR(14) NLD(4) USA(1)  
 11 GBR(2) IDN(1) NZL(2) USA (6)  
 11 AUT(3) GBR(2) NLD(2) USA (4)  
 6 AUS(1) GBR(2) NLD(1) SWE(1) THA(1)  
 20 DNK(1) FXX(1) GBR(5) IND(1) MUS(1) MYS(2) NLD(1) USA (8)  
 6 GBR(2) SAU(1) SDN(2) USA (1)  
 30 BEL(2) BGD(11) DNK(1) GBR(2) IND(2) IRN(2) NLD(2) SAU(2) SWE(3) USA (3)

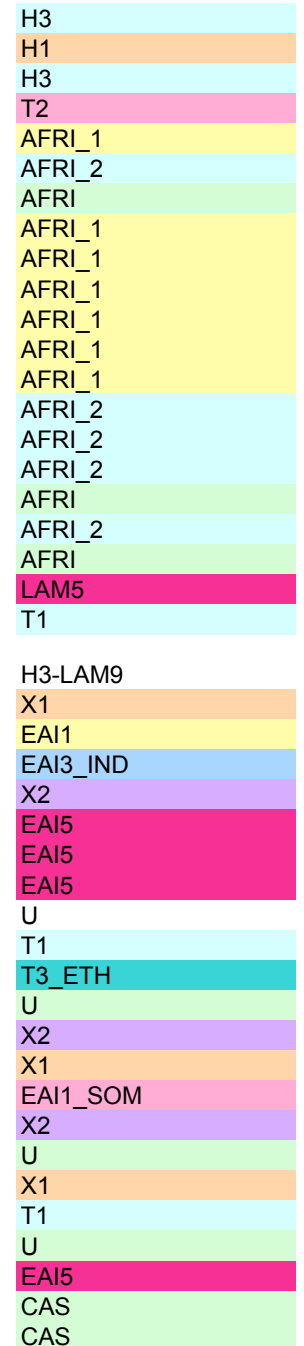











580 ██████████  
581 ██████████  
582 ██████████  
583 ██████████  
584 ██████████  
585 ██████████  
586 ██████████  
587 ██████████  
588 ██████████  
589 ██████████  
590 ██████████  
591 ██████████  
592 ██████████  
593 ██████████  
594 ██████████  
595 ██████████  
596 ██████████  
597 ██████████  
598 ██████████  
599 ██████████  
600 ██████████  
601 ██████████  
602 ██████████  
603 ██████████  
604 ██████████  
605 ██████████  
606 ██████████  
607 ██████████  
608 ██████████  
609 ██████████  
610 ██████████  
611 ██████████  
612 ██████████  
613 ██████████  
614 ██████████  
615 ██████████  
616 ██████████  
617 ██████████  
618 ██████████  
619 ██████████  
620 ██████████  
621 ██████████  
622 ██████████  
623 ██████████

2 NAM(2)  
2 NAM(1) USA (1)  
2 FXX(2)  
2 FXX(2)  
7 FXX(2) NLD(2) SWE(3)  
5 BRA(2) FXX(2) USA(1)  
2 FXX(2)  
8 BGD(3) DNK(1) FXX(1) GBR(1) NLD(1) USA (1)  
2 FXX(2)  
2 ESP(1) FXX(1)  
2 EAFR(1) FXX(1)  
24 AUT(2) BGD(1) FXX(1) ITA(1) MYS(10) NLD(4) SWE(1) THA(2) USA (2)  
6 CHE(1) FXX(1) GLP(1) SOM(3)  
9 ARG(4) FXX(3) GBR(2)  
43 ARG(8) BRA(7) GBR(8) IRL(10) PRY(1) SWE(1) USA(3) ZAF(5)  
5 DNK(1) IRN(2) NLD(1) USA(1)  
2 IRN(2)  
2 IRN(2)  
3 IRN(3)  
5 AUT(2) BEL(1) IRN(2)  
5 IRN(5)  
2 AUT(1) IRN(1)  
48 AUT(4) BEL(2) BRA(5) DEU(1) FIN(1) GEO(21) IDN(1) IRN(1) ITA(1) NLD(2)  
NZZ(1) RUS(1) SWE(1) USA(4) USA (1) VNM(1) ZAF(1)  
4 USA (2) VEN(2)  
4 ARG(1) BEL(1) GNB(1) VEN(1)  
20 USA (1) VEN(19)  
4 FXX(1) VEN(3)  
2 FXX(2)  
7 BEL(2) DEU(2) FXX(1) TUR(1) USA(1)  
3 FXX(3)  
3 BEL(1) FXX(2)  
2 FXX(1) GNB(1)  
7 ARG(1) FXX(2) GBR(1) USA (3)  
8 AUT(3) FXX(1) ITA(1) SWE(1) USA(2)  
2 FXX(1) USA (1)  
3 AUT(1) FXX(1) USA(1)  
3 USA (1) VNM(2)  
2 USA (1) VNM(1)  
6 FXX(1) NLD(1) THA(1) USA (1) VNM(2)  
3 USA (1) USA (1) VNM(1)  
7 AUT(3) BEL(1) FXX(1) USA (1) VNM(1)  
6 ARM(2) IND(1) USA(1) VNM(2)  
5 VNM(5)  
9 DEU(1) GUF(1) MYS(2) VNM(5)

LAM1  
T1  
X1  
MANU2  
T2  
BEIJING-LIKE  
H3  
AFRI  
U  
U  
T2  
EA16\_BGD1  
CANETTII  
PIN  
BOVIS1  
BOV  
H4  
H4  
CAS  
CAS  
CAS  
CAS  
U  
H3  
LAM2  
U  
U  
U  
U  
H1  
H1  
T1  
T1  
T1  
LAM9  
H3  
U  
EA15  
EA15  
U  
H1  
BEIJING  
EA14\_VNM  
U



624 ██████████ 2  
625 ██████████ 4  
626 ██████████ 2  
627 ██████████ 11  
628 ██████████ 3  
629 ██████████ 3  
630 ██████████ 6  
631 ██████████ 8  
632 ██████████ 3  
633 ██████████ 4  
634 ██████████ 6  
635 ██████████ 5  
636 ██████████ 7  
637 ██████████ 83  
638 ██████████ 2  
639 ██████████ 3  
640 ██████████ 2  
641 ██████████ 8  
642 ██████████ 8  
643 ██████████ 2  
644 ██████████ 27  
645 ██████████ 3  
646 ██████████ 14  
647 ██████████ 80  
648 ██████████ 2  
649 ██████████ 5  
650 ██████████ 10  
651 ██████████ 2  
652 ██████████ 5  
653 ██████████ 2  
654 ██████████ 4  
655 ██████████ 18  
656 ██████████ 2  
657 ██████████ 2  
658 ██████████ 41  
659 ██████████ 6  
660 ██████████ 4  
661 ██████████ 8  
662 ██████████ 30  
663 ██████████ 14  
664 ██████████ 2  
665 ██████████ 120  
666 ██████████ 7  
667 ██████████ 20

USA (2)  
GBR(1) NLD(1) USA (2)  
USA (2)  
FIN(1) IND(1) JPN(8) USA (1)  
AUT(1) NLD(1) USA (1)  
GBR(1) IND(1) USA (1)  
FXX(1) GLP(1) HTI(2) USA (2)  
AUT(1) BEL(2) BRA(1) CMR(1) CZE(1) FXX(1) USA (1)  
GEO(1) THA(2)  
GLP(1) HTI(3)  
ESP(6)  
BEL(1) BRA(4)  
BEL(7)  
BEL(55) FXX(28)  
NLD(2)  
GBR(3)  
GBR(2)  
GBR(7) USA (1)  
BEL(1) DEU(1) FXX(3) GBR(3)  
NLD(2)  
DEU(3) ESP(23) FXX(1)  
ESP(2) NLD(1)  
DEU(4) ESP(9) FXX(1)  
?(1) AUT(8) BEL(1) DEU(50) FXX(12) GBR(1) HND(2) ITA(3) SWE(2)  
NLD(2)  
KEN(2) NLD(2) SWE(1)  
BEL(2) DEU(1) FXX(6) NLD(1)  
GBR(1) NZL(1)  
DNK(2) GBR(1) NLD(2)  
NLD(2)  
IND(1) NLD(2) USA (1)  
BEL(1) FXX(1) IDN(6) NLD(3) USA (7)  
IRN(1) NLD(1)  
ARG(2)  
ARG(33) BRA(4) MEX(4)  
BDI(6)  
BDI(4)  
DEU(1) NLD(4) UGA(3)  
BEL(9) FXX(21)  
CAN(1) ESP(11) ITA(1) NLD(1)  
NLD(1) SAU(1)  
?(5) ARG(1) BEL(20) BRA(1) DEU(3) ESP(3) FXX(71) GBR(2) ITA(7) ITAS(1)  
NLD(2) REU(2) ZAF(2)  
GBR(7)  
ARG(1) ESP(1) GBR(10) IRL(8)

EAI3\_IND  
EAI5  
EAI5  
T3-OSA  
T1  
U  
T1  
H3  
BEIJING  
LAM4  
PINI  
T1  
BOV  
PINI  
LAM9  
MICROTI  
PIN  
MICROTI  
MICROTI  
U  
CAP  
CAP  
CAP  
CAP  
CAP  
T1  
BOV  
BOV  
EAI3\_IND  
LAM9  
EAI3\_IND  
H3  
H4  
BOV  
BOV  
BOVIS1  
BOVIS1  
BOVIS1  
BOV  
BOVIS1  
BOVIS1  
BOVIS1  
BOVIS3  
BOV

668 ██████████  
669 ██████████  
670 ██████████  
671 ██████████  
672 ██████████  
673 ██████████  
674 ██████████  
675 ██████████  
676 ██████████  
677 ██████████  
678 ██████████  
679 ██████████  
680 ██████████  
681 ██████████  
682 ██████████  
683 ██████████  
684 ██████████  
685 ██████████  
686 ██████████  
687 ██████████  
688 ██████████  
689 ██████████  
690 ██████████  
691 ██████████  
692 ██████████  
693 ██████████  
694 ██████████  
695 ██████████  
696 ██████████  
697 ██████████  
698 ██████████  
699 ██████████  
700 ██████████  
701 ██████████  
702 ██████████  
703 ██████████  
704 ██████████  
705 ██████████  
706 ██████████  
707 ██████████  
708 ██████████  
709 ██████████  
710 ██████████

11 ? (1) ARG(3) GBR(5) URY(1) ZAF(1)  
5 ARG(5)  
9 GBR(4) MEX(1) USA(2) ZAF(2)  
4 GBR(1) IRL(3)  
21 ARG(4) BRA(3) GBR(6) IRL(3) MEX(4) NZL(1)  
4 AUS(1) GBR(1) IRL(2)  
3 ARG(3)  
6 ARG(1) GBR(5)  
177 GBR(107) IRL(70)  
31 GBR(30) IRL(1)  
16 ARG(2) GBR(14)  
428 ARG(1) GBR(112) IRL(315)  
5 ARG(4) IRL(1)  
11 ARG(1) BRA(3) FXX(1) GBR(6)  
66 ARG(3) AUS(1) GBR(9) IRL(53)  
1811 ARG(250) AUS(1) BEL(2) BRA(25) FXX(10) GBR(481) IRL(993) MEX(7) MTQ(1) NLD(1)  
NZL(20) PRY(2) URY(3) USA (5) ZAF(10)  
25 BEL(4) DEU(1) FXX(8) NLD(2) USA(6) ZAF(4)  
10 ARG(2) DEU(3) FXX(1) GBR(3) IRL(1)  
2 DEU(2)  
2 ARG(2)  
25 GBR(3) IRL(22)  
12 GBR(2) IRL(10)  
5 SWE(1) ZAF(4)  
175 ARG(60) BRA(23) ESP(1) FXX(9) GBR(9) IRL(20) MEX(4) NZL(22) PRY(3) SWE(1)  
USA (3) ZAF(20)  
4 NLD(4)  
2 NLD(2)  
4 DEU(1) DNK(1) NLD(2)  
10 BEL(1) BRA(1) DEU(2) MEX(2) NLD(3) USA(1)  
21 AUT(1) BEL(1) DEU(1) FXX(16) NLD(2)  
8 DEU(2) NLD(3) SAU(3)  
55 ARG(13) BRA(23) CRI(1) ESP(5) FXX(5) MEX(4) NLD(3) USA (1)  
4 NLD(2) SWE(1) USA(1)  
4 NLD(4)  
3 NLD(2) SAU(1)  
15 CUB(2) GUF(1) MWI(12)  
4 NLD(2) SWE(2)  
2 IRN(1) NLD(1)  
2 NLD(2)  
2 NLD(2)  
4 ARG(2) IDN(1) NLD(1)  
7 AUT(1) DZA(1) NLD(4) RUS(1)  
2 NLD(2)  
4 NLD(4)

BOVIS1  
BOVIS1  
BOVIS1  
BOV  
BOV  
BOV  
BOV  
BOVIS2  
BOVIS2  
BOVIS2  
BOVIS2  
BOVIS2  
BOVIS2  
BOVIS2  
BOVIS2  
BOVIS1  
BOV  
BOV  
BOV  
BOVIS1  
BOVIS1  
BOVIS1  
BOVIS1  
BOVIS1  
BOVIS1  
BOV  
BOV  
BOV  
BOVIS1  
BOVIS1  
BOVIS1  
H3  
AFRI  
AFRI  
EAI5  
KILI  
CAS1\_DELHI  
T1  
T1  
S  
X1  
LAM9  
U

711 ██████████  
 712 ██████████  
 713 ██████████  
 714 ██████████  
 715 ██████████  
 716 ██████████  
 717 ██████████  
 718 ██████████  
 719 ██████████  
 720 ██████████  
 721 ██████████  
 722 ██████████  
 723 ██████████  
 724 ██████████  
 725 ██████████  
 726 ██████████  
 727 ██████████  
 728 ██████████  
 729 ██████████  
 730 ██████████  
 731 ██████████  
 732 ██████████  
 733 ██████████  
 734 ██████████  
 735 ██████████  
 736 ██████████  
 737 ██████████  
 738 ██████████  
 739 ██████████  
 740 ██████████  
 741 ██████████  
 742 ██████████  
 743 ██████████  
 744 ██████████  
 745 ██████████  
 746 ██████████  
 747 ██████████  
 748 ██████████  
 749 ██████████  
 750 ██████████  
 751 ██████████  
 752 ██████████  
 753 ██████████  
 754 ██████████  
 755 ██████████

7 DNK(2) FIN(1) GBR(1) NLD(2) USA (1)  
 2 NLD(2)  
 6 DNK(1) NLD(2) NZL(3)  
 4 HTI(4)  
 3 CMR(1) NLD(2)  
 2 GBR(2)  
 3 CUB(1) FXX(1) NLD(1)  
 2 CUB(1) IDN(1)  
 11 ARG(1) NLD(1) USA(2) ZAF(7)  
 4 ARG(4)  
 5 DNK(1) NLD(2) USA (1) ZAF(1)  
 2 IDN(2)  
 2 NLD(2)  
 3 MYS(2) NLD(1)  
 8 ARG(8)  
 7 AUS(1) NLD(3) SWE(2) USA(1)  
 5 NLD(1) POL(1) USA (2) VEN(1)  
 2 NLD(2)  
 4 GLP(1) HTI(3)  
 2 IND(2)  
 5 BEL(1) FXX(1) ITA(1) NLD(2)  
 9 ARG(4) AUT(1) USA (4)  
 5 IND(3) NLD(1) USA (1)  
 3 AUS(1) IDN(2)  
 3 DNK(1) NLD(2)  
 12 NLD(12)  
 7 FXX(1) ITA(3) MAR(1) VEN(2)  
 4 ARG(3) LVA(1)  
 3 NLD(3)  
 6 AUT(1) DEU(1) GLP(1) NLD(2) PER(1)  
 6 AUT(2) NLD(2) POL(1) USA (1)  
 18 AUT(2) IDN(2) MYS(3) THA(1) USA (8) VNM(2)  
 4 CZE(1) MYS(2) USA(1)  
 2 NLD(2)  
 27 IND(1) MYS(26)  
 11 BEL(2) FXX(1) IDN(1) NLD(1) POL(1) USA (5)  
 7 BRA(3) NLD(4)  
 2 NLD(2)  
 2 IDN(1) JPN(1)  
 18 ARG(3) AUT(8) EAFR(1) USA (6)  
 9 BEL(1) FXX(1) MAR(1) NLD(1) SAU(1) SWE(1) TUR(1) USA (2)  
 2 GBR(1) USA (1)  
 12 BRA(1) GUF(1) MWI(2) NLD(1) USA(2) ZAF(1) ZWE(4)  
 2 GBR(1) IRN(1)  
 2 ARG(1) USA(1)

EA11\_SOM  
 T2  
 T1  
 H3-LAM8  
 AFRI\_1  
 AFRI  
 T1  
 U  
 T1  
 U  
 U  
 EA11\_SOM  
 EA14\_VNM  
 U  
 LAM5  
 EA15  
 H1  
 T3  
 LAM1  
 EA11\_SOM  
 LAM9  
 T1  
 EA15  
 U  
 EA11\_SOM  
 T2  
 LAM9  
 LAM9  
 EA15  
 H3  
 H3  
 H3  
 U  
 U  
 EA11\_SOM  
 H3  
 H3  
 H3  
 U  
 H3  
 T1  
 BOV  
 LAM9  
 CAS1\_DELHI  
 H3

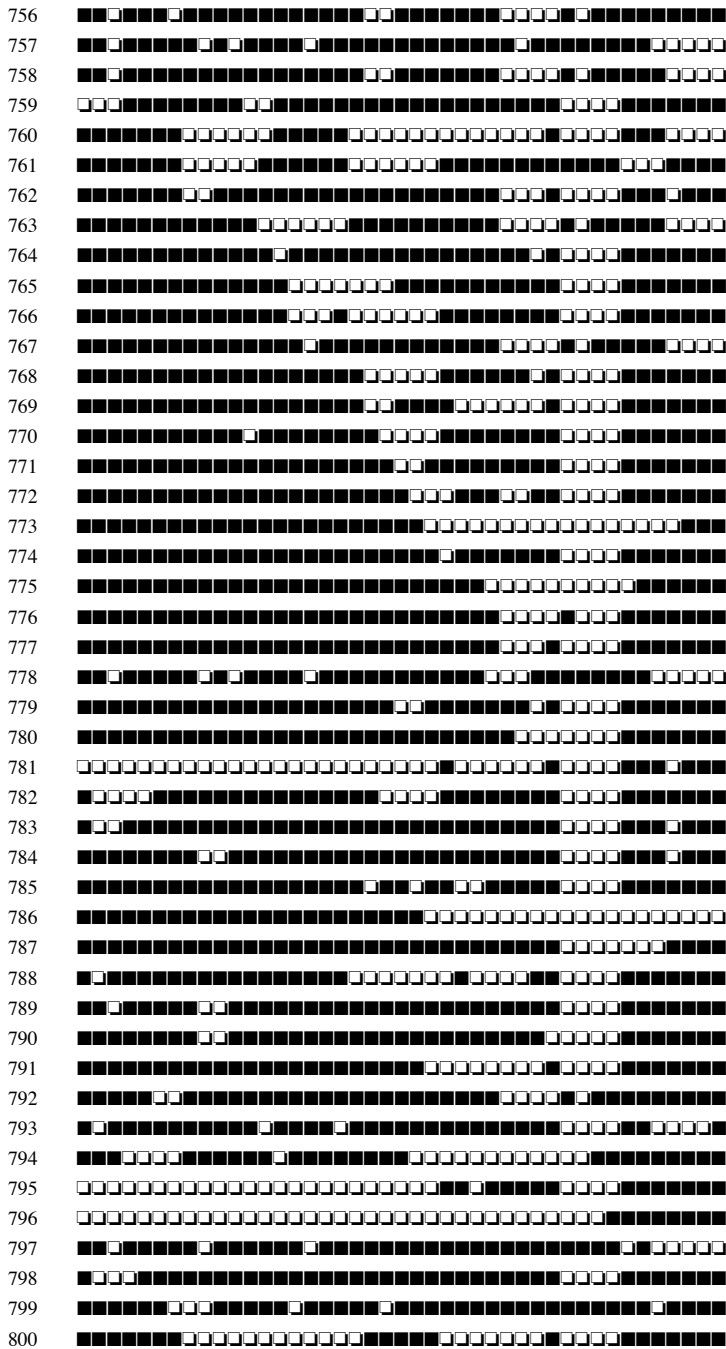

2 USA (1) VNM(1)  
 2 GBR(1) NLD(1)  
 2 PHL(1) USA (1)  
 2 TUR(2)  
 7 ARG(1) AUT(1) DZA(3) FXX(1) ITA(1)  
 3 DEU(1) USA(2)  
 2 NLD(1) RUS(1)  
 5 DNK(1) MYS(1) NLD(1) USA (2)  
 4 BEL(1) NLD(1) SEN(1) VNM(1)  
 5 DEU(1) NLD(1) USA (3)  
 11 EST(5) FIN(2) FXX(1) NLD(1) PRT(1) ZAF(1)  
 3 GBR(1) ITA(1) NLD(1)  
 6 AUT(1) DEU(2) NLD(1) USA (2)  
 2 AUT(1) CUB(1)  
 4 ARG(1) ESP(1) FXX(1) ITAS(1)  
 3 ARG(1) AUT(1) NLD(1)  
 8 FXX(2) ITA(2) NLD(1) SWE(1) USA(2)  
 5 IDN(1) USA (4)  
 5 CMR(2) IDN(1) RUS(1) USA (1)  
 20 AUT(4) CZE(8) HUN(1) NLD(1) SWE(1) USA (5)  
 4 IDN(1) MYS(2) USA (1)  
 24 ARM(1) BRA(1) FIN(1) GEO(1) KAZ(1) NLD(1) RUS(4) SAU(8) SWE(1) USA(5)  
 5 ARG(3) MEX(2)  
 2 FXX(2)  
 6 FXX(5) ZWE(1)  
 6 ARG(1) AUT(1) FXX(1) ITA(1) USA(2)  
 2 FXX(1) USA (1)  
 6 FXX(1) MYS(3) USA (2)  
 23 BRA(2) CAN(14) CUB(1) FXX(1) USA (3) ZAF(2)  
 2 FXX(1) NLD(1)  
 5 AUT(1) CMR(1) FXX(1) NLD(1) SWE(1)  
 4 AUT(1) FXX(1) MEX(1) USA(1)  
 3 NLD(1) SWE(1) USA(1)  
 7 ARG(1) AUT(2) ITAS(1) SWE(1) USA(1) ZAF(1)  
 4 AUS(1) SWE(1) USA(1) ZAF(1)  
 4 CUB(1) CZE(1) SWE(1) USA(1)  
 2 FXX(1) USA (1)  
 2 USA (2)  
 3 GBR(1) PAK(1) USA(1)  
 4 EGY(3) MYS(1)  
 7 BGD(2) GEO(3) USA (1) VNM(1)  
 5 FXX(3) USA (2)  
 2 FXX(1) NLD(1)  
 2 SEN(2)  
 3 USA (2) VNM(1)

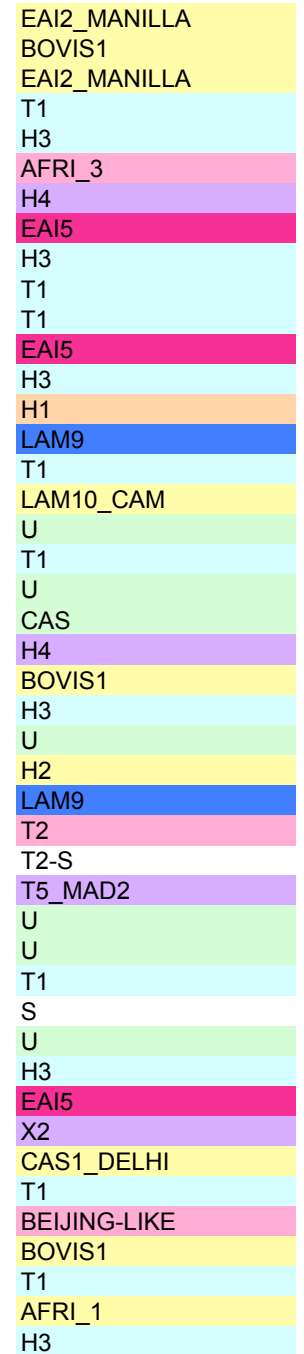

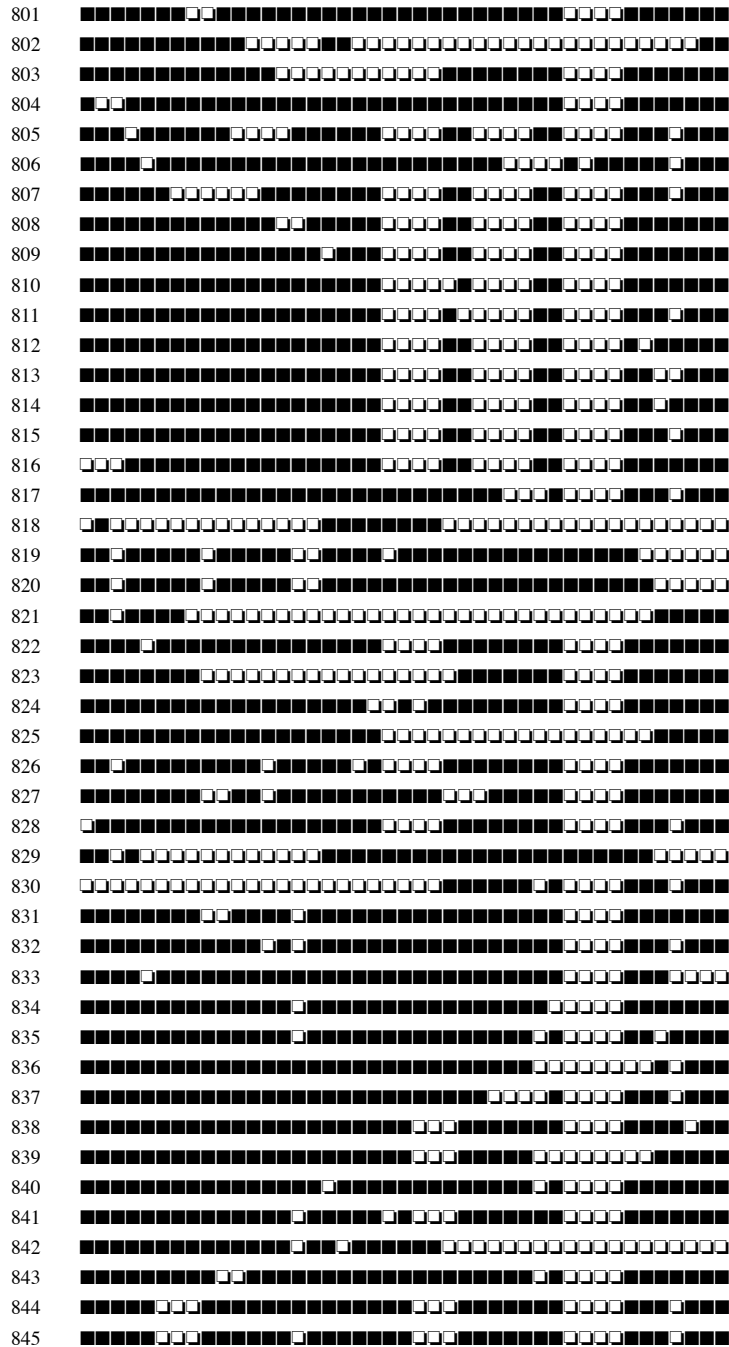

|    |                                                                               |
|----|-------------------------------------------------------------------------------|
| 3  | DEU(1) USA (1) ZWE(1)                                                         |
| 2  | VNM(2)                                                                        |
| 24 | ARM(2) BEL(1) CHN(1) EST(2) GEO(5) LVA(1) POL(1) RUS(7) SWE(1) USA (1) VNM(2) |
| 11 | AUT(1) DNK(1) IND(1) ITA(1) SWE(1) USA(1) USA (2) ZWE(3)                      |
| 2  | ZWE(2)                                                                        |
| 8  | MOZ(2) NOR(2) USA(2) ZWE(2)                                                   |
| 3  | ZWE(3)                                                                        |
| 2  | ZWE(2)                                                                        |
| 3  | ZWE(3)                                                                        |
| 2  | ZWE(2)                                                                        |
| 12 | MOZ(1) USA(1) ZAF(2) ZWE(8)                                                   |
| 3  | ZWE(3)                                                                        |
| 7  | USA(1) ZWE(6)                                                                 |
| 4  | ZWE(4)                                                                        |
| 14 | BEL(1) MWI(2) USA(2) ZWE(9)                                                   |
| 8  | MDG(1) MWI(5) USA(1) ZWE(1)                                                   |
| 4  | ETH(1) USA (2) ZWE(1)                                                         |
| 8  | AUT(1) DEU(4) FXX(2) ITA(1)                                                   |
| 3  | DEU(3)                                                                        |
| 47 | BRA(5) DEU(6) DNK(29) FXX(3) MEX(1) NOR(1) USA (2)                            |
| 6  | BRA(1) USA(4) VEN(1)                                                          |
| 4  | BRA(2) GLP(1) USA (1)                                                         |
| 10 | BRA(2) DEU(1) FIN(1) ITA(1) ITAS(1) USA(4)                                    |
| 3  | BRA(1) ESP(1) PER(1)                                                          |
| 4  | AUT(2) BRA(1) GBR(1)                                                          |
| 3  | BRA(2) VEN(1)                                                                 |
| 4  | ARG(1) BRA(2) ITA(1)                                                          |
| 6  | BRA(5) GNB(1)                                                                 |
| 8  | ARG(2) GBR(1) GLP(1) MEX(4)                                                   |
| 6  | CMR(2) FXX(1) GLP(1) USA(2)                                                   |
| 6  | FXX(1) GLP(1) ITAS(1) MYS(1) PRT(1) ZAF(1)                                    |
| 3  | FXX(3)                                                                        |
| 2  | FXX(2)                                                                        |
| 4  | FXX(2) IDN(1) PRT(1)                                                          |
| 2  | FXX(2)                                                                        |
| 3  | CMR(1) ITA(1) USA(1)                                                          |
| 2  | CMR(1) FXX(1)                                                                 |
| 6  | BEL(1) CMR(4) SDN(1)                                                          |
| 3  | CMR(2) FIN(1)                                                                 |
| 3  | CMR(2) SWE(1)                                                                 |
| 3  | CMR(3)                                                                        |
| 6  | CMR(5) ITA(1)                                                                 |
| 4  | AUT(1) CMR(1) MEX(1) POL(1)                                                   |
| 2  | CMR(2)                                                                        |
| 2  | CMR(2)                                                                        |

|           |
|-----------|
| T1        |
| ZERO      |
| T1        |
| T1        |
| LAM11_ZWE |
| EAI1_SOM  |
| LAM11_ZWE |
| LAM11_ZWE |
| LAM11_ZWE |
| T1        |
| LAM4      |
| LAM11_ZWE |
| LAM11_ZWE |
| LAM11_ZWE |
| LAM11_ZWE |
| LAM11_ZWE |
| H4        |
| CAP       |
| BOV       |
| BOV       |
| U         |
| LAM9      |
| T1        |
| T5        |
| U         |
| LAM2      |
| S         |
| LAM4      |
| BOV       |
| H3        |
| S         |
| T2-T3     |
| T1        |
| U         |
| H3        |
| U         |
| H3        |
| LAM10_CAM |
| U         |
| H3        |
| LAM10_CAM |
| U         |
| H3        |
| LAM10_CAM |
| LAM10_CAM |

846 ██████████  
847 ██████████  
848 ██████████  
849 ██████████  
850 ██████████  
851 ██████████  
852 ██████████  
853 ██████████  
854 ██████████  
855 ██████████  
856 ██████████  
857 ██████████  
858 ██████████  
859 ██████████  
860 ██████████  
861 ██████████  
862 ██████████  
863 ██████████  
864 ██████████  
865 ██████████  
866 ██████████  
867 ██████████  
868 ██████████  
869 ██████████  
870 ██████████  
871 ██████████  
872 ██████████  
873 ██████████  
874 ██████████  
875 ██████████  
876 ██████████  
877 ██████████  
878 ██████████  
879 ██████████  
880 ██████████  
881 ██████████  
882 ██████████  
883 ██████████  
884 ██████████  
885 ██████████  
886 ██████████  
887 ██████████  
888 ██████████  
889 ██████████  
890 ██████████

3 CMR(2) USA(1)  
4 CMR(4)  
10 CMR(4) DEU(1) FIN(1) GBR(1) LBY(1) USA(2)  
3 CMR(1) DEU(1) SEN(1)  
2 CMR(2)  
2 CMR(2)  
13 BEL(1) CMR(12)  
19 AUT(3) BEL(1) CMR(13) DEU(1) USA(1)  
2 CIV(1) CMR(1)  
2 CMR(2)  
4 CMR(4)  
2 CMR(2)  
3 CMR(3)  
3 CMR(2) USA(1)  
2 CIV(1) CMR(1)  
2 CMR(2)  
2 CMR(2)  
4 BRA(3) USA(1)  
9 IND(1) NLD(1) SUR(1) USA(6)  
3 USA(3)  
18 BRA(1) FXX(2) GNB(1) ITA(9) USA (4) VEN(1)  
5 USA (5)  
3 USA (3)  
3 USA (3)  
2 USA (2)  
12 ARG(2) ARM(1) FIN(1) ITA(1) USA (7)  
3 NLD(1) USA (2)  
3 NLD(1) USA (2)  
2 USA (2)  
4 FIN(1) USA (3)  
5 IND(2) NLD(2) USA (1)  
4 FIN(1) NLD(1) USA (2)  
8 AUT(2) BEL(1) EGY(1) GBR(1) LBY(1) TUR(1) USA (1)  
4 ARG(1) FXX(1) RUS(1) USA (1)  
7 MEX(2) USA(3) VEN(1) ZAF(1)  
4 USA(3) VEN(1)  
17 BGD(12) GEO(1) ITA(1) MYS(1) USA (2)  
5 ESP(1) ITA(1) USA (3)  
7 ESP(1) ITA(1) USA(4) ZAF(1)  
2 USA (2)  
2 USA (2)  
2 USA (2)  
5 ESP(1) ITA(1) POL(1) USA (2)  
3 IND(1) USA (2)  
7 USA (7)

T2  
LAM10\_CAM  
T2  
H3  
LAM10\_CAM  
U  
LAM10\_CAM  
T2  
T1  
H3  
AFRI\_3  
AFRI\_3  
AFRI\_3  
AFRI  
AFRI\_2  
AFRI\_2  
T2  
U  
CAS  
EAI3\_IND  
LAM9  
LAM5-LAM6  
X1  
T1  
T2  
H3  
T1  
CAS  
S  
T2  
CAS  
U  
X1  
T1  
T1  
U  
EAI6\_BGD1  
H1  
S  
LAM5  
X2  
H3  
T1  
EAI6\_BGD1  
T1

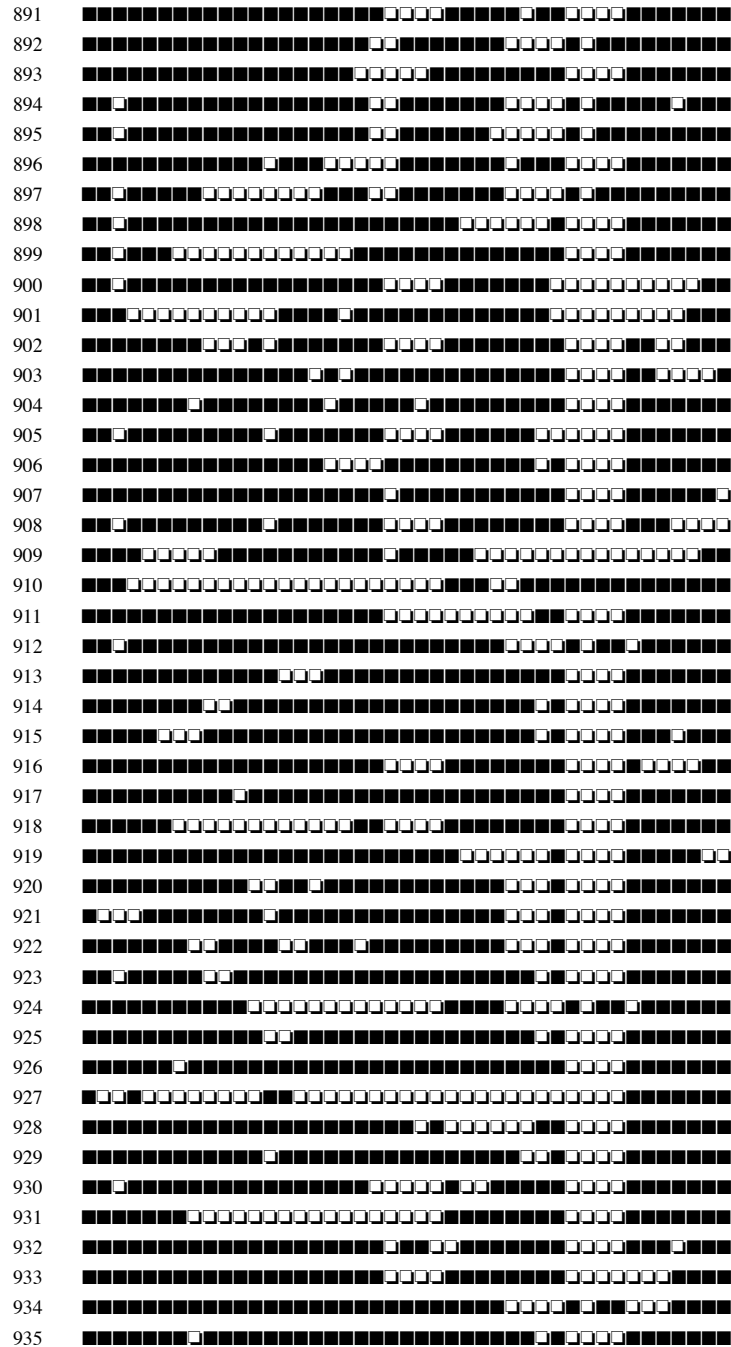

|    |                                                   |
|----|---------------------------------------------------|
| 12 | ESP(1) POL(7) RUS(1) USA (3)                      |
| 3  | USA(3)                                            |
| 2  | SEN(1) USA (1)                                    |
| 9  | MYS(1) PHL(4) USA (4)                             |
| 4  | PHL(2) USA (2)                                    |
| 3  | CUB(1) USA (2)                                    |
| 4  | AUS(1) MYL(1) USA (2)                             |
| 3  | NLD(1) USA (2)                                    |
| 2  | USA (2)                                           |
| 2  | USA (2)                                           |
| 3  | USA (3)                                           |
| 3  | USA (3)                                           |
| 3  | USA(3)                                            |
| 6  | USA (6)                                           |
| 15 | ARG(1) USA (5) VEN(9)                             |
| 4  | USA (4)                                           |
| 2  | USA (2)                                           |
| 7  | USA (7)                                           |
| 14 | CAN(9) USA (5)                                    |
| 5  | ETH(2) USA (3)                                    |
| 20 | ARG(1) USA (19)                                   |
| 5  | NOR(1) USA(4)                                     |
| 10 | AUT(2) CHN(2) FIN(1) MWI(1) SWE(1) USA (2) VEN(1) |
| 35 | CAN(22) FIN(7) HTI(1) ITA(2) USA (2) VEN(1)       |
| 2  | FIN(2)                                            |
| 4  | FIN(2) USA(2)                                     |
| 7  | DNK(1) FIN(2) LVA(1) USA (3)                      |
| 8  | EST(4) FIN(1) ITA(1) SWE(2)                       |
| 5  | CZE(1) FIN(1) POL(2) USA (1)                      |
| 2  | FIN(2)                                            |
| 5  | FIN(5)                                            |
| 2  | FIN(2)                                            |
| 3  | FIN(3)                                            |
| 9  | COM(2) FIN(1) GUF(3) MUS(1) NLD(1) SWE(1)         |
| 5  | AUT(2) FIN(3)                                     |
| 8  | ARM(3) FIN(1) GUF(1) ITA(1) USA(1) VEN(1)         |
| 2  | FIN(2)                                            |
| 10 | FIN(8) USA (2)                                    |
| 2  | FIN(1) GBR(1)                                     |
| 6  | BEL(2) FIN(2) NLD(1) TUR(1)                       |
| 2  | FIN(1) NLD(1)                                     |
| 4  | BEL(1) FIN(1) RUS(1) USA (1)                      |
| 5  | FIN(1) RUS(2) USA (2)                             |
| 6  | FIN(1) SWE(1) THA(2) USA(2)                       |
| 5  | FIN(2) USA(3)                                     |

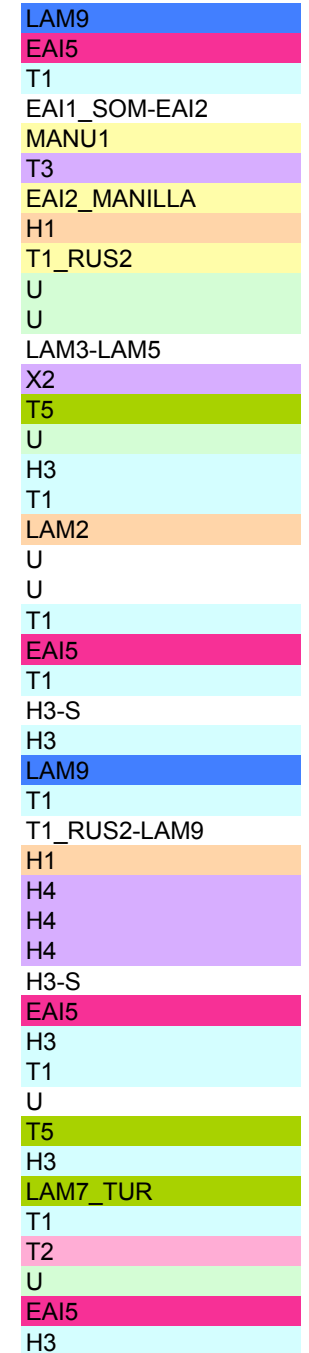





|      |            |    |                              |        |
|------|------------|----|------------------------------|--------|
| 981  | ██████████ | 5  | FXX(5)                       | BOV    |
| 982  | ██████████ | 2  | ESP(1) FXX(1)                | BOV    |
| 983  | ██████████ | 3  | FXX(3)                       | BOV    |
| 984  | ██████████ | 2  | FXX(2)                       | BOVIS1 |
| 985  | ██████████ | 3  | FXX(3)                       | BOVIS1 |
| 986  | ██████████ | 3  | DEU(1) FXX(2)                | BOVIS1 |
| 987  | ██████████ | 2  | FXX(2)                       | BOV    |
| 988  | ██████████ | 2  | FXX(2)                       | BOV    |
| 989  | ██████████ | 6  | ? (1) FXX(2) USA(3)          | BOVIS1 |
| 990  | ██████████ | 21 | BEL(4) FXX(17)               | BOVIS1 |
| 991  | ██████████ | 30 | ?(1) BEL(1) FXX(28)          | BOVIS1 |
| 992  | ██████████ | 2  | FXX(2)                       | BOVIS1 |
| 993  | ██████████ | 3  | FXX(3)                       | BOVIS1 |
| 994  | ██████████ | 2  | FXX(2)                       | BOVIS1 |
| 995  | ██████████ | 4  | FXX(4)                       | BOVIS1 |
| 996  | ██████████ | 2  | FXX(2)                       | BOV    |
| 997  | ██████████ | 28 | ARG(2) BRA(1) FXX(20) MEX(5) | BOVIS1 |
| 998  | ██████████ | 2  | FXX(2)                       | BOV    |
| 999  | ██████████ | 22 | FXX(22)                      | BOV    |
| 1000 | ██████████ | 19 | FXX(19)                      | BOVIS1 |
| 1001 | ██████████ | 4  | FXX(4)                       | BOVIS1 |
| 1002 | ██████████ | 9  | FXX(9)                       | BOVIS1 |
| 1003 | ██████████ | 6  | FXX(4) MWI(2)                | BOVIS1 |
| 1004 | ██████████ | 6  | FXX(4) ITA(2)                | BOVIS1 |
| 1005 | ██████████ | 2  | ESP(1) FXX(1)                | BOVIS1 |
| 1006 | ██████████ | 2  | FXX(2)                       | BOV    |
| 1007 | ██████████ | 2  | FXX(2)                       | BOV    |
| 1008 | ██████████ | 6  | ARG(3) FXX(1) GBR(1) MEX(1)  | BOV    |
| 1009 | ██████████ | 2  | FXX(2)                       | BOVIS1 |
| 1010 | ██████████ | 4  | ESP(1) FXX(3)                | BOVIS1 |
| 1011 | ██████████ | 3  | FXX(2) NLD(1)                | BOV    |
| 1012 | ██████████ | 2  | FXX(2)                       | BOV    |
| 1013 | ██████████ | 6  | FXX(6)                       | BOV    |
| 1014 | ██████████ | 4  | FXX(4)                       | BOV    |
| 1015 | ██████████ | 5  | FXX(5)                       | BOV    |
| 1016 | ██████████ | 13 | FXX(13)                      | BOVIS1 |
| 1017 | ██████████ | 3  | FXX(3)                       | BOVIS1 |
| 1018 | ██████████ | 2  | ESP(2)                       | BOVIS1 |
| 1019 | ██████████ | 6  | DEU(2) DNK(1) FXX(3)         | BOVIS1 |
| 1020 | ██████████ | 7  | FXX(7)                       | BOVIS1 |
| 1021 | ██████████ | 6  | BRA(2) FXX(2) MEX(2)         | BOVIS1 |
| 1022 | ██████████ | 13 | DEU(6) FXX(7)                | BOVIS1 |
| 1023 | ██████████ | 4  | FXX(3) ZAF(1)                | BOVIS1 |
| 1024 | ██████████ | 2  | FXX(2)                       | BOVIS1 |
| 1025 | ██████████ | 3  | FXX(3)                       | BOVIS1 |



1071 ██████████ □□ □□□ ██████████ □□□ ██████████  
1072 ██████████ □ □□ □□□ ██████████ □□□ ██████████  
1073 ██████████ □□ ██████████ □□□ ██████████  
1074 ██████████ □□□ ██████████ □□□ ██████████ □  
1075 ██████████ □□□ ██████████ □□□ ██████████  
1076 □□□□ ██████████ □□□ ██████████ □□□ ██████████  
1077 ██████████ □ ██████████ □□□ ██████████ □  
1078 □ ██████████ □□□ ██████████ □ ██████████ □□□ ██████████  
1079 ██████████ □ ██████████ □□□ ██████████ □□□ ██████████  
1080 ██████████ □ ██████████ □□□ ██████████ □□□ ██████████  
1081 ██████████ □ ██████████ □ ██████████ □□□ ██████████ □  
1082 ██████████ ██████████ □□□ ██████████ □ ██████████ □  
1083 ██████████ □□□□□□□□□□□□□□□□□□□□□□□□□□  
1084 ██████████ □□□□□□□□□□□□□□□□□□□□□□ □□□ ██████████  
1085 ██████████ ██████████ □□ □□ □□□ ██████████ □  
1086 ██████████ □□□ ██████████ □ ██████████ □□□ ██████████ □  
1087 □□ ██████████ □□□ ██████████ □□□ ██████████  
1088 ██████████ □ ██████████ □□ ██████████  
1089 ██████████ □□□ ██████████ □□□□□□□□□□□□□□  
1090 □□ ██████████ □□□ ██████████ □ ██████████  
1091 ██████████ □□□ ██████████ □□□□□□□□□□ □ ██████████  
1092 ██████████ □ ██████████ □□□□□□□□□□ ██████████  
1093 ██████████ □□□ ██████████ □□□□□□□□□□ ██████████  
1094 ██████████ ██████████ □ ██████████ □ ██████████  
1095 □□□□□□□□ ██████████ □ ██████████ □□□ ██████████  
1096 ██████████ □ ██████████ □ ██████████  
1097 ██████████ □□□ ██████████ □□□ ██████████ □□□ ██████████  
1098 ██████████ ██████████ □□□ ██████████ □ ██████████  
1099 ██████████ □□□□□□□□□□□□□□ ██████████ □□□ ██████████  
1100 □□□ ██████████ □ ██████████ □□□ ██████████ □□□ ██████████  
1101 □□□□□□□□ ██████████ □ ██████████ □□□□□□□□□□□□□□  
1102 ██████████ □□□ ██████████ □ ██████████ □□□ ██████████ □□□ ██████████  
1103 ██████████ □□□□□□□□□□ ██████████ □ ██████████ □□□ ██████████  
1104 ██████████ ██████████ □ ██████████ □ ██████████  
1105 ██████████ ██████████ □ ██████████ □□□ ██████████  
1106 ██████████ ██████████ □□□ ██████████ □□□ ██████████ □□□ ██████████  
1107 ██████████ ██████████ □□□□□□□□□□ ██████████ □□□ ██████████  
1108 □□□□□□□□□□ ██████████ □ ██████████ □□□□□□□□□□□□□□  
1109 □□□□□□□□□□ ██████████ □□□□□□□□□□ ██████████ □□□ ██████████  
1110 □ ██████████ □□□ ██████████ □□□ ██████████  
1111 □ ██████████ □ ██████████ □□□ ██████████ □□□ ██████████ □  
1112 ██████████ □□□ ██████████ ██████████ □□□ ██████████  
1113 ██████████ □□ ██████████ ██████████ □□□ ██████████  
1114 ██████████ □ ██████████ □ ██████████ □□□ ██████████ □ ██████████  
1115 ██████████ □ ██████████ ██████████ □□□ ██████████ □□□ ██████████

4 MAR(4)  
3 MAR(3)  
2 FXX(1) MAR(1)  
7 DEU(2) ITAS(1) MAR(2) USA(2)  
3 FXX(1) MAR(1) USA(1)  
5 IDN(1) MOZ(1) RUS(2) USA (1)  
4 AUT(1) IDN(2) VNM(1)  
2 IDN(2)  
3 IDN(2) MYS(1)  
5 IDN(2) ITA(1) USA(2)  
2 IDN(1) USA (1)  
2 IDN(2)  
6 IDN(1) MYS(2) USA (3)  
4 GUF(4)  
2 FXX(1) MTQ(1)  
3 MTQ(3)  
4 GLP(1) HTI(1) USA(2)  
6 IND(5) PRT(1)  
3 IND(2) USA (1)  
3 IND(2) NLD(1)  
6 IND(2) PAK(1) USA(3)  
6 IND(2) ITA(1) USA (1) ZAF(2)  
5 GBR(1) IND(2) SAU(1) USA(1)  
2 IND(2)  
2 IND(2)  
2 IND(2)  
3 AUS(1) USA(2)  
3 USA(3)  
30 USA(30)  
2 USA(2)  
2 USA(2)  
2 USA(2)  
2 VEN(2)  
5 CHN(1) PER(1) USA (3)  
11 ITAS(1) PER(1) PRT(9)  
3 FXX(1) ITA(1) PER(1)  
4 AUT(1) DEU(3)  
5 AUT(5)  
20 AUT(20)  
21 AUT(20) DEU(1)  
3 AUT(2) USA (1)  
10 AUT(8) BEL(1) ZAF(1)  
6 AUT(4) LVA(1) POL(1)  
3 AUT(3)

LAM9  
LAM5  
T1  
LAM9  
LAM9  
LAM9  
T2  
T2  
T1  
X1  
X1  
EA15  
U  
T1  
H3  
LAM4-LAM5  
T1  
MANU2  
CAS  
EA15  
CAS1\_DELHI  
CAS1\_DELHI  
CAS  
MANU2  
X1  
MANU2  
EA13\_IND  
U  
T1  
X2  
U  
X1  
T1\_RUS2  
T5  
T1  
LAM9  
T1  
CAP  
CAP  
T1  
T1  
T1  
S  
T2  
U





1206 ██████████  
1207 ██████████  
1208 ██████████  
1209 ██████████  
1210 ██████████  
1211 ██████████  
1212 ██████████  
1213 ██████████  
1214 ██████████  
1215 ██████████  
1216 ██████████  
1217 ██████████  
1218 ██████████  
1219 ██████████  
1220 ██████████  
1221 ██████████  
1222 ██████████  
1223 ██████████  
1224 ██████████  
1225 ██████████  
1226 ██████████  
1227 ██████████  
1228 ██████████  
1229 ██████████  
1230 ██████████  
1231 ██████████  
1232 ██████████  
1233 ██████████  
1234 ██████████  
1235 ██████████  
1236 ██████████  
1237 ██████████  
1238 ██████████  
1239 ██████████  
1240 ██████████  
1241 ██████████  
1242 ██████████  
1243 ██████████  
1244 ██████████  
1245 ██████████  
1246 ██████████  
1247 ██████████  
1248 ██████████  
1249 ██████████  
1250 ██████████

2 ITAS(1) USA (1)  
2 ITAS(2)  
2 FXX(1) USA(1)  
3 MEX(2) USA (1)  
4 MEX(2) USA(2)  
2 MEX(1) USA(1)  
2 MEX(2)  
2 USA(2)  
11 DEU(1) GUF(1) MDG(8) POL(1)  
5 MEX(2) USA(2) VEN(1)  
2 USA(2)  
2 USA(2)  
2 GBR(1) USA(1)  
4 MEX(4)  
2 USA(2)  
2 FXX(1) MEX(1)  
2 IDN(1) USA(1)  
3 MDG(1) USA(1) USA (1)  
2 USA(2)  
2 MEX(2)  
4 USA(4)  
6 DEU(1) ESP(4) USA(1)  
2 AUS(1) MEX(1)  
3 AUT(1) POL(1) USA(1)  
3 ARG(1) NLD(1) USA(1)  
2 USA(2)  
3 USA(3)  
3 MEX(2) USA(1)  
6 USA(6)  
2 MEX(1) USA (1)  
13 MEX(4) USA(9)  
3 USA (3)  
3 GLP(1) MEX(1) VEN(1)  
2 MEX(1) USA(1)  
2 LVA(1) USA (1)  
28 ARG(13) BRA(3) GUF(1) USA(2) ZAF(9)  
8 ITA(6) USA (2)  
3 ARG(1) ITA(1) MYS(1)  
2 CAN(2)  
3 CAN(2) USA(1)  
8 CAN(7) EST(1)  
10 IND(1) LVA(1) RUS(8)  
3 RUS(3)  
3 RUS(2) USA (1)  
2 FXX(1) RUS(1)

U  
U  
H1  
T1  
LAM9  
S  
T1  
LAM2  
T1  
LAM2  
U  
EAI2\_MANILLA  
U  
T1  
LAM9  
T1  
LAM9  
T1  
LAM3  
S  
U  
T5\_MAD2  
T2  
H3  
H1  
T5  
T2  
T1  
H3  
H3  
U  
T1  
H3  
U  
T1  
U  
H4-S  
H3  
S  
U  
H3  
MANU2  
T1  
LAM9  
U













1476 ██████████  
1477 ██████████  
1478 ██████████  
1479 ██████████  
1480 ██████████  
1481 ██████████  
1482 ██████████  
1483 ██████████  
1484 ██████████  
1485 ██████████  
1486 ██████████  
1487 ██████████  
1488 ██████████  
1489 ██████████  
1490 ██████████  
1491 ██████████  
1492 ██████████  
1493 ██████████  
1494 ██████████  
1495 ██████████  
1496 ██████████  
1497 ██████████  
1498 ██████████  
1499 ██████████  
1500 ██████████  
1501 ██████████  
1502 ██████████  
1503 ██████████  
1504 ██████████  
1505 ██████████  
1506 ██████████  
1507 ██████████  
1508 ██████████  
1509 ██████████  
1510 ██████████  
1511 ██████████  
1512 ██████████  
1513 ██████████  
1514 ██████████  
1515 ██████████  
1516 ██████████  
1517 ██████████  
1518 ██████████  
1519 ██████████  
1520 ██████████

6 ARG(2) PER(2) USA(2)  
2 PHL(2)  
2 PHL(2)  
7 DEU(1) MYS(2) PHL(2) USA(2)  
4 RUS(4)  
2 RUS(2)  
3 LVA(1) RUS(2)  
3 RUS(2) USA (1)  
2 CUB(1) RUS(1)  
3 RUS(3)  
2 GUF(1) USA (1)  
2 MYS(1) USA (1)  
2 MYS(1) USA (1)  
2 MYS(2)  
2 MYS(2)  
4 GBR(1) MYS(3)  
2 MYS(2)  
2 GBR(1) MYS(1)  
5 BEL(1) IDN(3) MYS(1)  
2 MYS(1) THA(1)  
2 MYS(2)  
2 MYS(1) THA(1)  
6 MYS(2) USA (4)  
3 MYS(2) USA(1)  
2 MYS(2)  
4 MYS(3) PHL(1)  
2 MYS(2)  
2 MYS(2)  
2 MYS(2)  
2 MYS(2)  
3 MYS(3)  
2 MYS(2)  
2 MYS(2)  
3 DEU(1) PHL(2)  
2 PHL(2)  
2 PHL(2)  
3 MYS(3)  
2 MYS(2)  
6 MDG(4) USA(2)  
3 MDG(3)  
3 MDG(3)  
6 MDG(6)  
17 MDG(16) SAU(1)  
2 MDG(2)  
3 MDG(3)

U  
EAI2\_MANILLA  
EAI2\_MANILLA  
U  
H4  
MANU2  
MANU2  
T1  
MANU2  
MANU2  
X3  
U  
U  
EAI5  
EAI2\_MANILLA  
T2  
U  
EAI5  
T1  
EAI5  
EAI6\_BGD1  
EAI5  
U  
EAI2\_MANILLA  
U  
EAI2\_MANILLA  
MANU1  
EAI6\_BGD1  
EAI5  
LAM9  
EAI6\_BGD1  
EAI6\_BGD1  
EAI5  
U  
U  
EAI2\_MANILLA  
EAI2\_MANILLA  
EAI6\_BGD1  
U  
U  
U  
U  
U  
U

1521 ██████████  
 1522 ██████████  
 1523 ██████████  
 1524 ██████████  
 1525 ██████████  
 1526 ██████████  
 1527 ██████████  
 1528 ██████████  
 1529 ██████████  
 1530 ██████████  
 1531 ██████████  
 1532 ██████████  
 1533 ██████████  
 1534 ██████████  
 1535 ██████████  
 1536 ██████████  
 1537 ██████████  
 1538 ██████████  
 1539 ██████████  
 1540 ██████████  
 1541 ██████████  
 1542 ██████████  
 1543 ██████████  
 1544 ██████████  
 1545 ██████████  
 1546 ██████████  
 1547 ██████████  
 1548 ██████████  
 1549 ██████████  
 1550 ██████████  
 1551 ██████████  
 1552 ██████████  
 1553 ██████████  
 1554 ██████████  
 1555 ██████████  
 1556 ██████████  
 1557 ██████████  
 1558 ██████████  
 1559 ██████████  
 1560 ██████████  
 1561 ██████████  
 1562 ██████████  
 1563 ██████████  
 1564 ██████████  
 1565 ██████████

2 MDG(2)  
 2 MDG(2)  
 2 MDG(2)  
 3 MDG(3)  
 4 FXX(1) MDG(3)  
 2 GUF(2)  
 3 DEU(1) SWE(1) USA (1)  
 2 BRA(1) SWE(1)  
 2 AUT(1) ESP(1)  
 6 ESP(3) USA (3)  
 2 ESP(2)  
 2 ESP(1) USA(1)  
 2 AUT(1) ESP(1)  
 3 ESP(1) USA (2)  
 6 ARG(1) BEL(1) BRA(2) ESP(1) USA(1)  
 2 BRA(1) ESP(1)  
 2 ESP(1) ITAS(1)  
 4 BEL(1) ESP(2) NLD(1)  
 4 ESP(3) MYS(1)  
 2 ESP(1) IDN(1)  
 2 ESP(2)  
 2 ESP(1) USA (1)  
 2 ESP(2)  
 3 BEL(1) FXX(1) ITA(1)  
 6 BEL(5) BRA(1)  
 4 NZL(2) USA (2)  
 4 DNK(1) EGY(1) IDN(1) POL(1)  
 2 BEL(1) FXX(1)  
 4 BDI(1) BEL(3)  
 2 AUT(2)  
 3 AUT(1) SWE(1) USA(1)  
 4 AUT(4)  
 2 AUT(2)  
 7 AUT(6) DEU(1)  
 2 POL(2)  
 2 AUT(1) POL(1)  
 8 POL(8)  
 11 AUT(1) DEU(1) POL(9)  
 5 MTQ(1) POL(3) USA (1)  
 2 FXX(1) POL(1)  
 2 POL(2)  
 3 BEL(1) FIN(1) POL(1)  
 2 NLD(1) POL(1)  
 4 POL(2) RUS(2)  
 5 AUT(3) POL(1) SWE(1)

U  
 MANU2  
 MANU2  
 U  
 LAM3  
 T1  
 H1-X1  
 LAM9  
 U  
 LAM9  
 U  
 X1  
 H3  
 LAM5-LAM6  
 LAM9  
 S  
 LAM3  
 H3  
 H3  
 LAM9  
 LAM9-S  
 X2  
 U  
 T2  
 LAM9  
 EAI5  
 T3  
 U  
 LAM11\_ZWE  
 T1  
 CAS  
 H1  
 T1  
 LAM4  
 U  
 T1  
 H1  
 T1  
 U  
 T1  
 U  
 T1  
 X1  
 T1









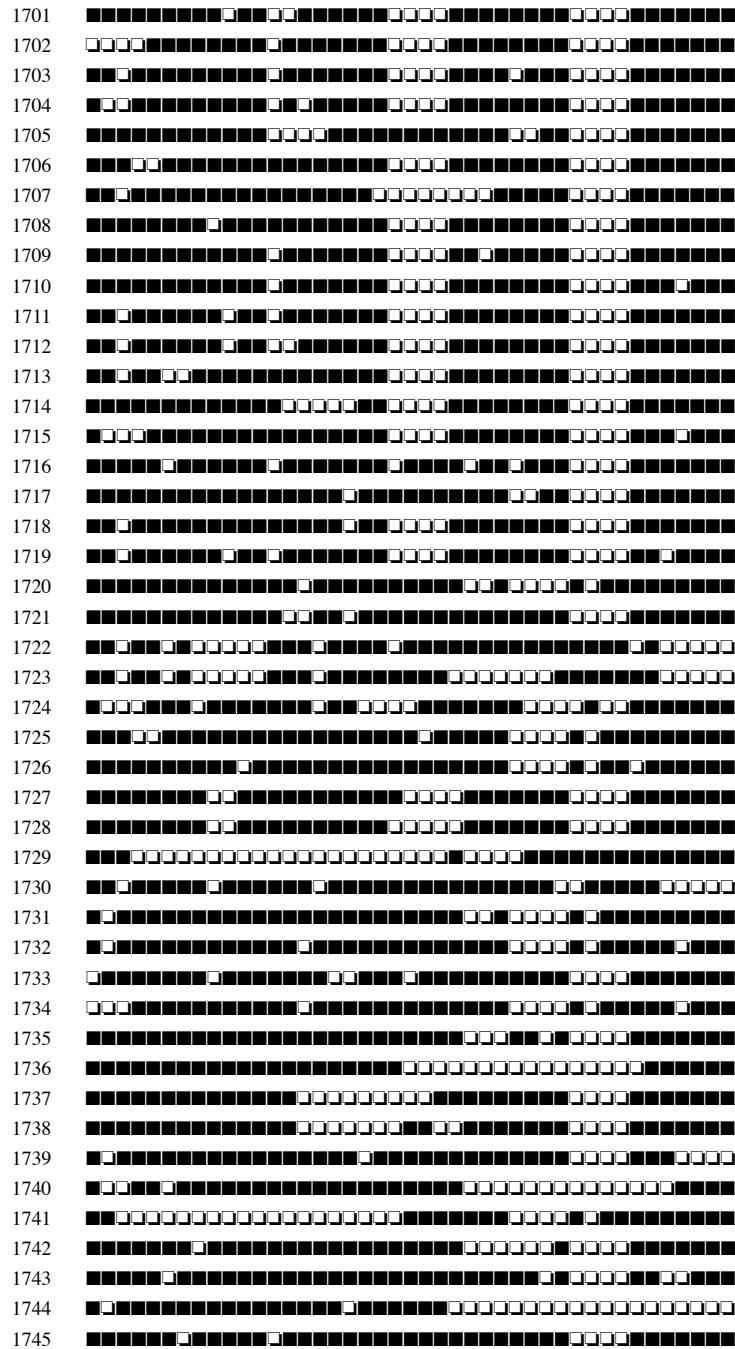

3 VEN(3)  
 3 VEN(3)  
 2 VEN(2)  
 2 VEN(2)  
 2 VEN(2)  
 3 CZE(1) USA (1) VEN(1)  
 2 VEN(2)  
 2 LVA(1) VEN(1)  
 2 USA (1) VEN(1)  
 3 BRA(1) NLD(1) VEN(1)  
 2 VEN(2)  
 2 USA(1) VEN(1)  
 3 VEN(3)  
 2 VEN(2)  
 3 ITA(1) VEN(2)  
 2 VEN(2)  
 2 AUS(1) VEN(1)  
 3 VEN(3)  
 2 VEN(2)  
 2 DNK(2)  
 2 DNK(3)  
 2 GBR(1) USA (1)  
 2 GBR(2)  
 2 GBR(2)  
 2 MYS(2)  
 2 DNK(1) USA (1)  
 2 DNK(1) GRL(1)  
 2 DNK(2)  
 2 DNK(1) ETH(1)  
 3 DEU(1) DNK(2)  
 2 DNK(2)  
 4 DNK(4)  
 2 DNK(1) NLD(1)  
 2 DNK(2)  
 2 ITA(2)  
 2 ITA(1) USA (1)  
 11 ITA(9) USA(1) ZAF(1)  
 5 ITA(5)  
 2 GUF(1) ITA(1)  
 2 ITA(1) USA(1)  
 2 ITA(1) USA(1)  
 2 FXX(1) ITA(1)  
 4 BEL(2) ITA(1) NLD(1)  
 2 ITA(2)  
 3 CZE(1) ITA(1) USA(1)

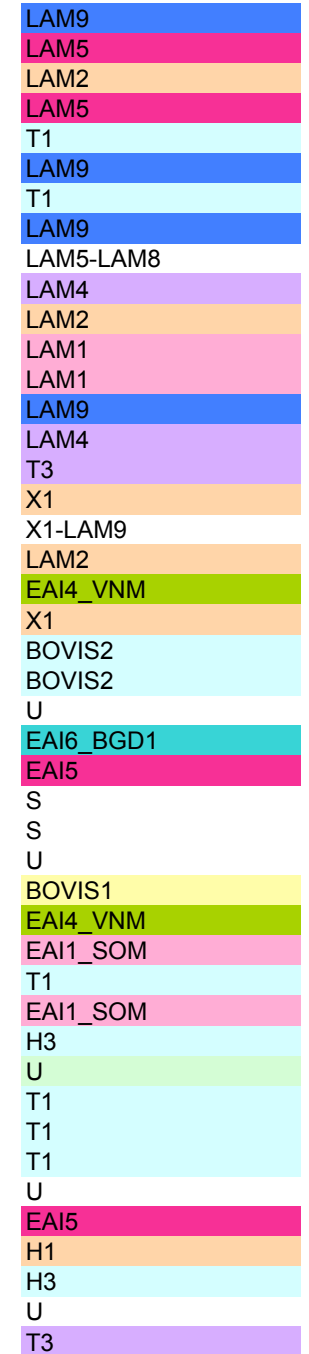

|      |            |    |                             |
|------|------------|----|-----------------------------|
| 1746 | ██████████ | 3  | BEL(1) ITA(1) POL(1)        |
| 1747 | ██████████ | 2  | DEU(1) USA(1)               |
| 1748 | ██████████ | 5  | DEU(5)                      |
| 1749 | ██████████ | 2  | DEU(2)                      |
| 1750 | ██████████ | 3  | ITA(1) PRT(2)               |
| 1751 | ██████████ | 3  | AUS(1) PRT(2)               |
| 1752 | ██████████ | 3  | PRT(2) USA (1)              |
| 1753 | ██████████ | 2  | FXX(1) PRT(1)               |
| 1754 | ██████████ | 5  | PRT(5)                      |
| 1755 | ██████████ | 4  | PRT(2) USA (2)              |
| 1756 | ██████████ | 2  | PRT(1) USA (1)              |
| 1757 | ██████████ | 2  | PRT(2)                      |
| 1758 | ██████████ | 2  | BRA(1) PRT(1)               |
| 1759 | ██████████ | 3  | PRT(3)                      |
| 1760 | ██████████ | 2  | DEU(1) PRT(1)               |
| 1761 | ██████████ | 3  | BEL(1) BRA(1) GUF(1)        |
| 1762 | ██████████ | 2  | GUF(1) MTQ(1)               |
| 1763 | ██████████ | 2  | ESP(1) GUF(1)               |
| 1764 | ██████████ | 2  | KEN(2)                      |
| 1765 | ██████████ | 5  | KEN(1) UGA(1) USA(2) ZMB(1) |
| 1766 | ██████████ | 2  | KEN(1) USA (1)              |
| 1767 | ██████████ | 2  | KEN(1) RUS(1)               |
| 1768 | ██████████ | 2  | CUB(1) MYS(1)               |
| 1769 | ██████████ | 2  | CUB(1) VEN(1)               |
| 1770 | ██████████ | 2  | FXX(2)                      |
| 1771 | ██████████ | 3  | HUN(3)                      |
| 1772 | ██████████ | 2  | FXX(1) HUN(1)               |
| 1773 | ██████████ | 10 | HUN(10)                     |
| 1774 | ██████████ | 2  | BEL(2)                      |
| 1775 | ██████████ | 2  | BEL(1) GBR(1)               |
| 1776 | ██████████ | 2  | BEL(2)                      |
| 1777 | ██████████ | 2  | BEL(2)                      |
| 1778 | ██████████ | 2  | BEL(1) KEN(1)               |
| 1779 | ██████████ | 11 | BEL(11)                     |
| 1780 | ██████████ | 14 | BEL(14)                     |
| 1781 | ██████████ | 2  | BEL(1) USA(1)               |
| 1782 | ██████████ | 2  | BEL(1) GBR(1)               |
| 1783 | ██████████ | 3  | BEL(2) NLD(1)               |
| 1784 | ██████████ | 2  | BEL(1) DNK(1)               |
| 1785 | ██████████ | 7  | BEL(7)                      |
| 1786 | ██████████ | 3  | BEL(3)                      |
| 1787 | ██████████ | 2  | BEL(1) SDN(1)               |
| 1788 | ██████████ | 3  | BEL(3)                      |
| 1789 | ██████████ | 4  | BEL(1) PAK(1) SAU(1) USA(1) |
| 1790 | ██████████ | 3  | AUT(1) BEL(1) EGY(1)        |

|              |
|--------------|
| S            |
| T5           |
| H3           |
| H3           |
| LAM4         |
| X3           |
| U            |
| T1           |
| T1           |
| LAM1         |
| X3           |
| U            |
| U            |
| LAM8         |
| LAM3         |
| T1           |
| EAI3_IND     |
| H3           |
| U            |
| CAS1_KILI    |
| LAM9         |
| T1           |
| LAM6         |
| LAM1         |
| H2           |
| H1           |
| U            |
| T1           |
| T4           |
| EAI2_MANILLA |
| U            |
| CAS1_DELHI   |
| U            |
| T1           |
| U            |
| EAI2_MANILLA |
| AFRI_1       |
| LAM10_CAM-S  |
| BOV          |
| T1           |
| T1           |
| CAS1_DELHI   |
| U            |
| CAS1_DELHI   |
| T1           |

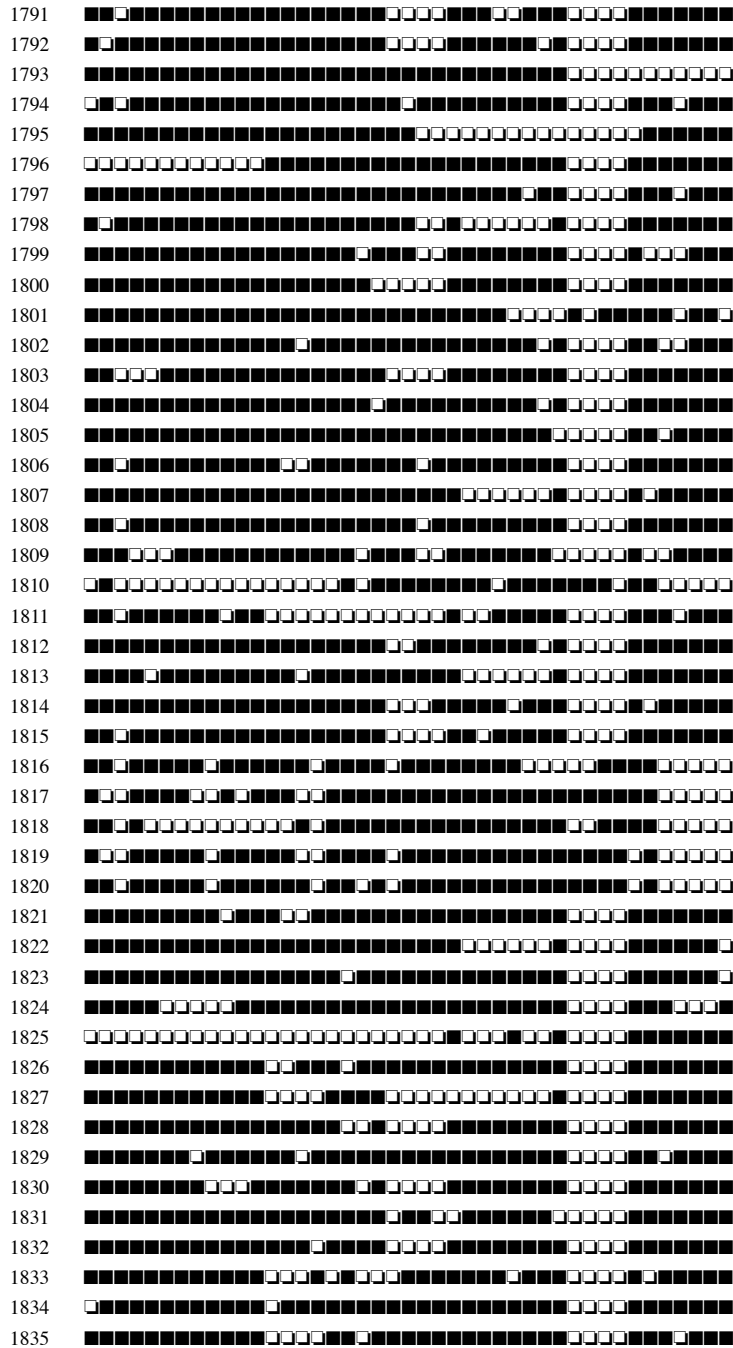

2 BEL(2)  
 2 BEL(2)  
 2 AUT(1) BEL(1)  
 2 BEL(2)  
 2 AUT(1) BEL(1)  
 2 BEL(2)  
 3 BEL(1) FXX(1) ITA(1)  
 2 BEL(2)  
 3 AUT(1) BEL(1) HUN(1)  
 3 CHN(1) MWI(1) USA (1)  
 2 FXX(1) USA (1)  
 3 FXX(2) GLP(1)  
 3 ARG(1) FXX(1) SEN(1)  
 3 AUT(1) ITA(1) USA(1)  
 3 AUT(2) BRA(1)  
 2 AUT(2)  
 2 AUT(2)  
 2 AUT(1) BEL(1)  
 2 AUT(2)  
 3 AUT(3)  
 2 AUT(2)  
 3 AUT(2) VEN(1)  
 2 AUT(1) FXX(1)  
 2 AUT(2)  
 2 BRA(2)  
 3 BRA(2) MEX(1)  
 2 BRA(2)  
 2 BRA(1) MEX(1)  
 4 MEX(4)  
 4 BRA(1) MEX(3)  
 2 ARG(1) NOR(1)  
 13 ARG(8) USA(5)  
 2 ARG(1) DEU(1)  
 4 ARG(2) BRA(1) PYF(1)  
 6 ARG(6)  
 2 ARG(1) GBR(1)  
 3 ARG(3)  
 3 ARG(1) NZL(2)  
 2 ARG(1) FXX(1)  
 3 ARG(1) CUB(1) ITA(1)  
 2 ARG(2)  
 7 ARG(5) NZL(2)  
 2 ARG(2)  
 2 ARG(1) USA(1)  
 4 ARG(4)

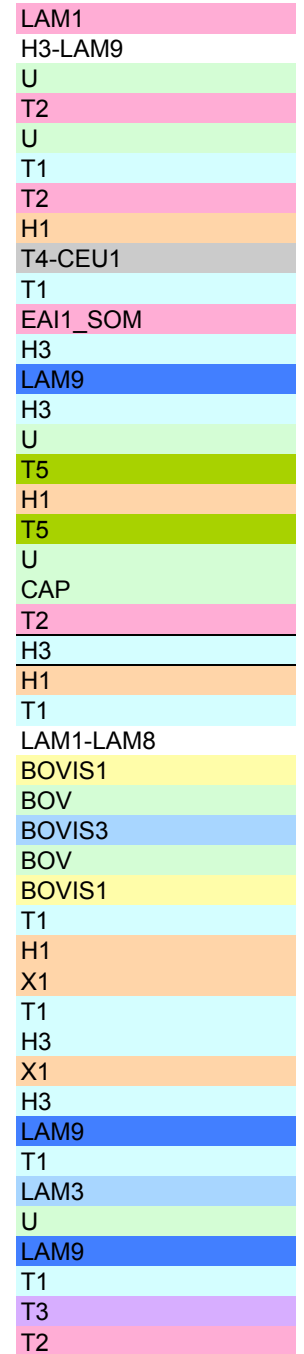



1881 ██████████  
1882 ██████████  
1883 ██████████  
1884 ██████████  
1885 ██████████  
1886 ██████████  
1887 ██████████  
1888 ██████████  
1889 ██████████  
1890 ██████████  
1891 ██████████  
1892 ██████████  
1893 ██████████  
1894 ██████████  
1895 ██████████  
1896 ██████████  
1897 ██████████  
1898 ██████████  
1899 ██████████  
1900 ██████████  
1901 ██████████  
1902 ██████████  
1903 ██████████  
1904 ██████████  
1905 ██████████  
1906 ██████████  
1907 ██████████  
1908 ██████████  
1909 ██████████  
1910 ██████████  
1911 ██████████  
1912 ██████████  
1913 ██████████  
1914 ██████████  
1915 ██████████  
1916 ██████████  
1917 ██████████  
1918 ██████████  
1919 ██████████  
1920 ██████████  
1921 ██████████  
1922 ██████████  
1923 ██████████  
1924 ██████████  
1925 ██████████

3 FXX(1) SAU(2)  
2 SAU(1) USA(1)  
2 SAU(2)  
2 AUT(1) SAU(1)  
3 SAU(3)  
3 PHL(1) SAU(2)  
4 SAU(4)  
3 BRA(2) VEN(1)  
2 BRA(2)  
2 BRA(2)  
3 BRA(3)  
2 BRA(2)  
2 BRA(2)  
2 BRA(2)  
2 BRA(2)  
2 BGD(2)  
10 BGD(10)  
24 BGD(24)  
2 VNM(2)  
2 VNM(2)  
2 AUS(1) VNM(1)  
4 VNM(4)  
2 VNM(2)  
3 AUT(1) ITA(1) VNM(1)  
2 ARG(1) BRA(1)  
3 BRA(3)  
2 BRA(2)  
2 BRA(1) USA(1)  
3 BRA(2) VEN(1)  
2 BRA(2)  
2 BRA(2)  
2 ARG(1) MTQ(1)  
2 FXX(1) GLP(1)  
2 ITA(1) VEN(1)  
2 ITA(1) MTQ(1)  
5 ITA(1) SEN(1) TUR(3)  
2 ITA(2)  
3 ITA(3)  
2 ITA(2)  
15 ITA(15)  
2 ITA(2)  
2 ITA(1) USA(1)  
2 ITA(1) USA(1)  
3 EGY(1) ITA(2)  
2 ITA(2)

- EA15
- CAS1\_DELHI
- CAS1\_DELHI
- U
- T1
- EA15
- U
- T1
- T1
- T2
- H3
- U
- H3
- LAM9
- LAM4
- MANU3
- U
- EA17\_BGD2
- T1
- EA15
- EA14\_VNM
- EA11\_SOM-EA14
- EA14\_VNM
- U
- T1
- LAM6
- U
- H3
- T1
- T3
- T3
- T5
- T5
- LAM6
- S
- T1
- T1
- U
- H3
- U
- T2
- X1
- U
- LAM7\_TUR
- U
